# Supplementary material
Source: PubMed Central journal article supplement (PMC5201133)
Supplement: NIHMS836642-supplement-NMR_and_mass_spectra_of_selected_compounds_and_other_data.pdf [file NIHMS836642-supplement-NMR_and_mass_spectra_of_selected_compounds_and_other_data.pdf]

**Supporting Information:****Structure-Based Scaffold Repurposing for for G Protein-Coupled Receptors (GPCRs):****Transformation of Adenosine Derivatives into 5HT<sub>2B</sub>/5HT<sub>2C</sub> Serotonin Receptor****Antagonists**

Dilip K. Tosh, Antonella Ciancetta, Eugene Warnick, Steven Crane, Zhan-Guo Gao, and

Kenneth A. Jacobson

| <b>Contents</b>                                                                                                                                                                      | <b>Page</b> |
|--------------------------------------------------------------------------------------------------------------------------------------------------------------------------------------|-------------|
| <b>Figure S1.</b> Ligand-protein IE profile during 30 ns of MD simulation.                                                                                                           | S2          |
| <b>Figure S2.</b> A) Superimposition between initial and MD refined <b>23</b> -h5HT <sub>2B</sub> R structures. B) Average water density during 30 ns of MD simulation.              | S3          |
| <b>Figure S3.</b> Heteroatoms distance distribution in selected pairs of residues during 30 ns of MD simulations.                                                                    | S4          |
| <b>Table S1.</b> Docking scores of analyzed compound at the h5HT <sub>2B</sub> R.                                                                                                    | S5          |
| <b>Table S2.</b> Structure based sequence alignment of TM4 of aminergic and nucleotide class A GPCRs.                                                                                | S6-S7       |
| <b>Table S3.</b> MD trajectory analysis.                                                                                                                                             | S8          |
| Caption of <b>Video S1.</b>                                                                                                                                                          | S9          |
| <b>Figure S4.</b> Correlation plot of affinity of 2-Cl (N)-methanocarpa adenosine derivatives (compounds <b>13</b> – <b>35</b> ) at the 5HT <sub>2B</sub> R and 5HT <sub>2C</sub> R. | S10         |
| <b>Figure S5.</b> Off-target activities (other than 5HT, graphs).                                                                                                                    | S11-S13     |
| <b>Figure S6.</b> 5HT <sub>2R</sub> functional assays of <b>26</b> (graphs).                                                                                                         | S14         |
| <b>Figure S7.</b> Summary of 5HT <sub>2R</sub> , AR and PK data for key compounds.                                                                                                   | S15         |
| <b>Figure S8.</b> Spectra of selected compounds.                                                                                                                                     | S16-S20     |
| <b>ADME-tox assays.</b> Procedures and data.                                                                                                                                         | S21-S30     |

**Figure S1.** IE profile obtained during 30 ns of MD simulations of the **23**-h5HT<sub>2B</sub>R complex starting from the docking pose. The electrostatic ( $IE_{ele}$ ) and van der Waal ( $IE_{vdw}$ ) contributions and the total IE ( $IE_{tot}$ ) are represented as blue, green and pink lines, respectively. IE values are in Kcal/mol.

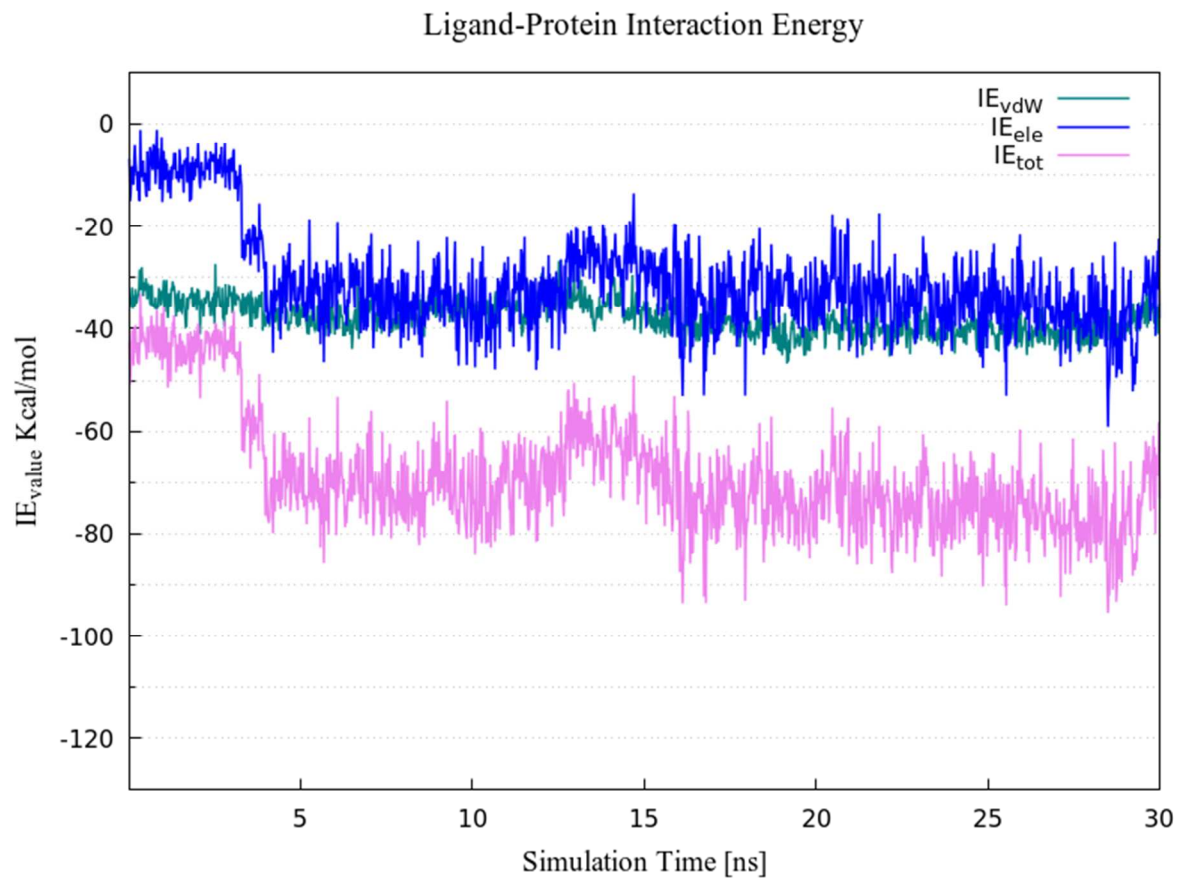

**Figure S2.** Panel A: superimposition between initial (pink) and MD refined (green) **23**-h5HT<sub>2B</sub>R complex structure. Panel B: average water density during 30 ns of MD simulation of **23**-h5HT<sub>2B</sub>R complex. Structural alignment was based upon alpha carbon atoms of TM domains. Ligand and selected residues are represented as van der Waals spheres.

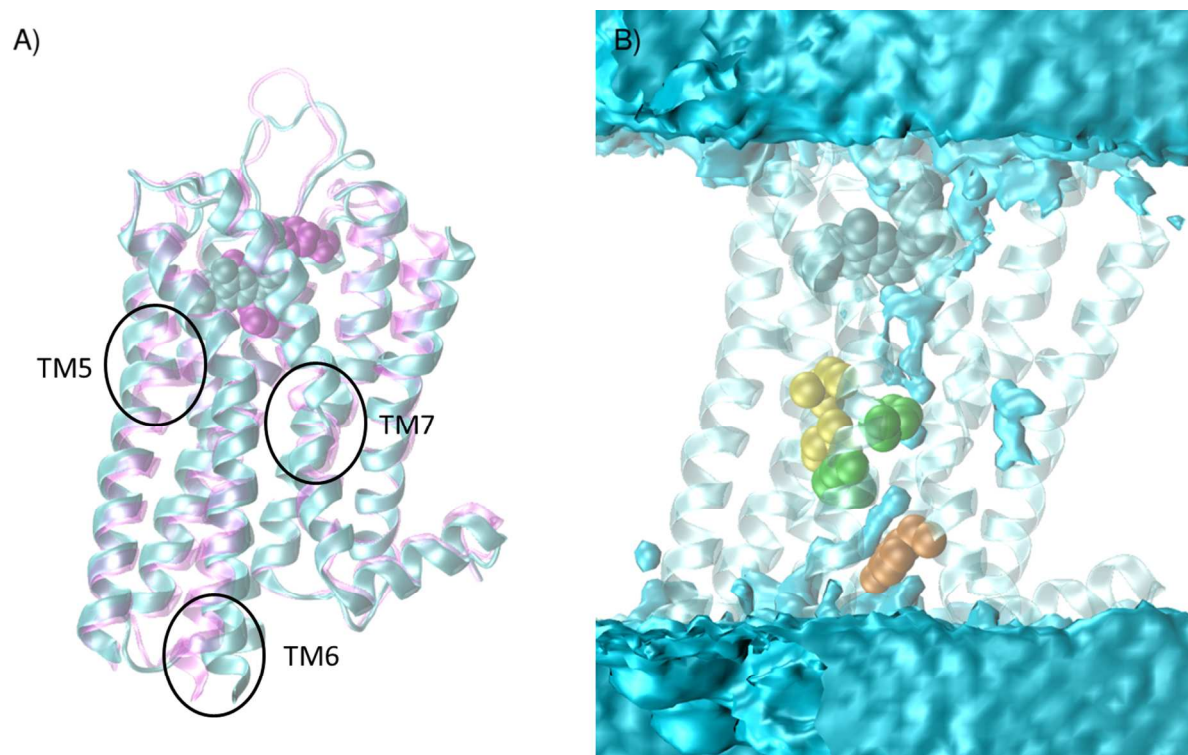

**Figure S3.** Heteroatoms distance distribution in selected pairs of conserved residues during 30 ns of MD simulations of the 23-h5HT<sub>2B</sub>R (green line) and the h5HT<sub>2B</sub>R-apo (magenta line) structures.

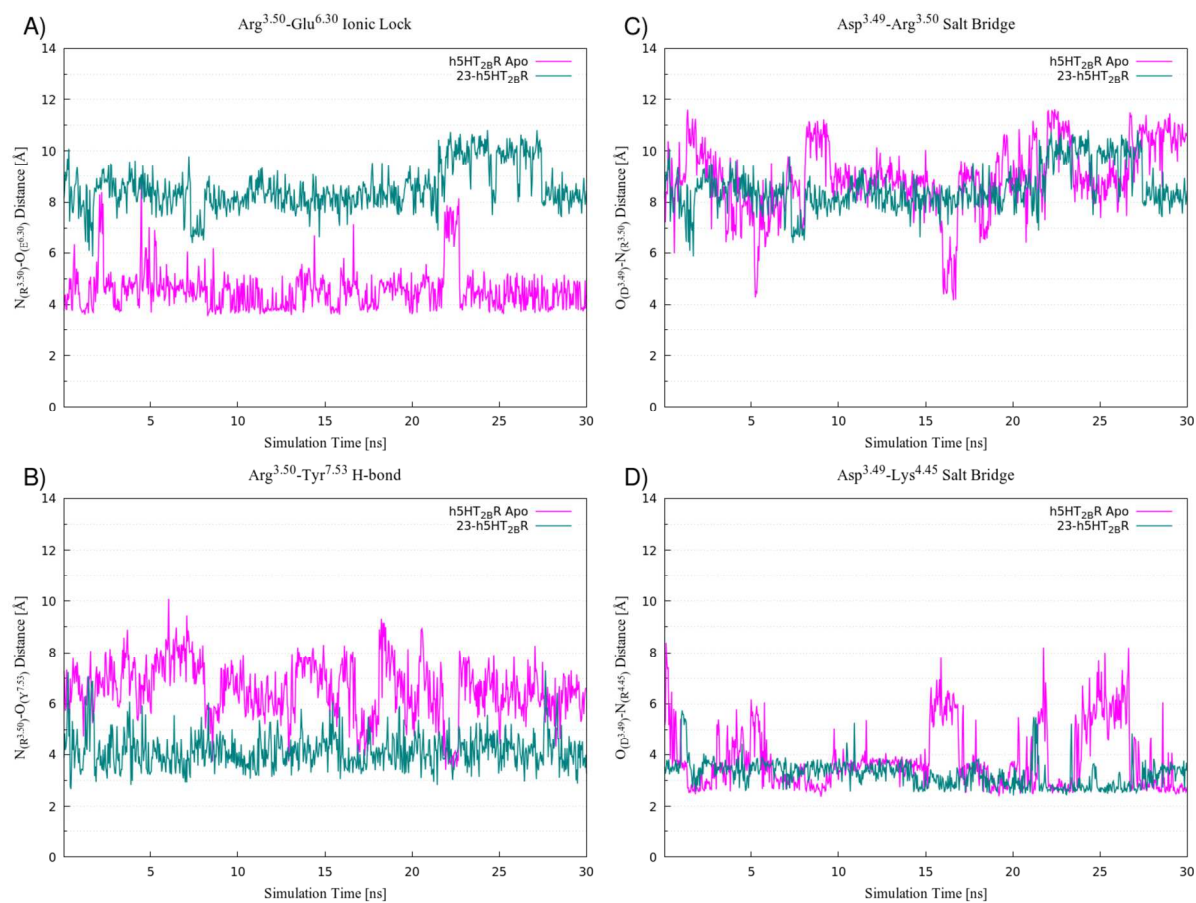

**Table S1.** Docking scores obtained at the h5HT<sub>2B</sub>R. Values are in Kcal/mol.

| <b>Compound</b> | <b>SP scoring function</b> | <b>XP scoring function</b> |
|-----------------|----------------------------|----------------------------|
| <b>14</b>       | <b>-8.284</b>              | <b>-10.496</b>             |
| <b>23</b>       | <b>-7.713</b>              | <b>-9.823</b>              |
| <b>25</b>       | <b>-8.012</b>              | <b>-9.342</b>              |
| <b>26a</b>      | <b>-7.908</b>              | <b>-10.286</b>             |
| <b>26b</b>      | <b>-7.771</b>              | <b>-9.577</b>              |
| <b>27</b>       | <b>-7.965</b>              | <b>-9.471</b>              |
| <b>35</b>       | <b>-7.892</b>              | <b>-11.481</b>             |

**Table S2.** Structure based sequence alignment of TM4 (up to conserved 4.50 residue) of aminergic and nucleotide class A GPCRs.

| <b>Receptor</b>          | 4.35 | 4.36 | 4.37 | 4.38 | 4.39 | 4.40 | 4.41 | 4.42 | 4.43 | 4.44 | 4.45     | 4.46 | 4.47 | 4.48 | 4.49 | 4.50 |
|--------------------------|------|------|------|------|------|------|------|------|------|------|----------|------|------|------|------|------|
| 5-HT1A receptor          | -    | -    | -    | -    | P    | R    | R    | A    | A    | A    | L        | I    | S    | L    | T    | W    |
| 5-HT1B receptor          | -    | -    | -    | -    | P    | K    | R    | A    | A    | V    | M        | I    | A    | L    | V    | W    |
| 5-HT1D receptor          | -    | -    | -    | -    | A    | G    | H    | A    | A    | T    | M        | I    | A    | I    | V    | W    |
| 5-HT1E receptor          | -    | -    | -    | -    | A    | K    | R    | A    | A    | L    | M        | I    | L    | T    | V    | W    |
| 5-HT1F receptor          | -    | -    | -    | -    | P    | K    | H    | A    | G    | I    | M        | I    | T    | I    | V    | W    |
| 5-HT2A receptor          | -    | -    | -    | -    | R    | T    | K    | A    | F    | L    | <b>K</b> | I    | I    | A    | V    | W    |
| 5-HT2B receptor          | -    | -    | -    | -    | R    | A    | T    | A    | F    | I    | <b>K</b> | I    | T    | V    | V    | W    |
| 5-HT2C receptor          | -    | -    | -    | -    | R    | T    | K    | A    | I    | M    | <b>K</b> | I    | A    | I    | V    | W    |
| 5-HT4 receptor           | -    | -    | -    | -    | P    | L    | R    | I    | A    | L    | M        | L    | G    | G    | C    | W    |
| 5-HT5A receptor          | -    | -    | -    | -    | K    | C    | V    | S    | N    | V    | M        | I    | A    | L    | T    | W    |
| 5-HT6 receptor           | -    | -    | -    | -    | P    | L    | R    | A    | L    | A    | L        | V    | L    | G    | A    | W    |
| 5-HT7 receptor           | -    | -    | -    | -    | G    | K    | C    | M    | A    | K    | M        | I    | L    | S    | V    | W    |
| M1 receptor              | -    | -    | -    | -    | P    | R    | R    | A    | A    | L    | M        | I    | G    | L    | A    | W    |
| M2 receptor              | -    | -    | -    | -    | T    | K    | M    | A    | G    | M    | M        | I    | A    | A    | A    | W    |
| M3 receptor              | -    | -    | -    | -    | T    | K    | R    | A    | G    | V    | M        | I    | G    | L    | A    | W    |
| M4 receptor              | -    | -    | -    | -    | T    | K    | M    | A    | G    | L    | M        | I    | A    | A    | A    | W    |
| M5 receptor              | -    | -    | -    | -    | P    | K    | R    | A    | G    | I    | M        | I    | G    | L    | A    | W    |
| $\alpha$ 1A-adrenoceptor | -    | -    | -    | -    | Q    | R    | R    | G    | L    | M    | A        | L    | L    | C    | V    | W    |
| $\alpha$ 1B-adrenoceptor | -    | -    | -    | -    | R    | R    | K    | A    | I    | L    | A        | L    | L    | S    | V    | W    |
| $\alpha$ 1D-adrenoceptor | -    | -    | -    | -    | E    | R    | K    | A    | A    | A    | I        | L    | A    | L    | L    | W    |
| $\alpha$ 2A-adrenoceptor | -    | -    | -    | -    | P    | R    | R    | I    | K    | A    | I        | I    | I    | T    | V    | W    |
| $\alpha$ 2B-adrenoceptor | -    | -    | -    | -    | P    | R    | R    | I    | K    | C    | I        | I    | L    | T    | V    | W    |
| $\alpha$ 2C-adrenoceptor | -    | -    | -    | -    | P    | R    | R    | V    | K    | A    | T        | I    | V    | A    | V    | W    |
| $\beta$ 1-adrenoceptor   | -    | -    | -    | -    | R    | A    | R    | A    | R    | G    | L        | V    | C    | T    | V    | W    |
| $\beta$ 2-adrenoceptor   | -    | -    | -    | -    | K    | N    | K    | A    | R    | V    | I        | I    | L    | M    | V    | W    |
| $\beta$ 3-adrenoceptor   | -    | -    | -    | -    | K    | R    | C    | A    | R    | T    | A        | V    | V    | L    | V    | W    |
| D1 receptor              | -    | -    | -    | -    | P    | K    | A    | A    | F    | I    | L        | I    | S    | V    | A    | W    |
| D2 receptor              | -    | -    | -    | -    | K    | R    | R    | V    | T    | V    | M        | I    | S    | I    | V    | W    |
| D3 receptor              | -    | -    | -    | -    | C    | R    | R    | V    | A    | L    | M        | I    | T    | A    | V    | W    |
| D4 receptor              | -    | -    | -    | -    | S    | R    | R    | Q    | L    | L    | L        | I    | G    | A    | T    | W    |
| D5 receptor              | -    | -    | -    | -    | Q    | R    | M    | A    | L    | V    | M        | V    | G    | L    | A    | W    |
| H1 receptor              | -    | -    | -    | -    | K    | T    | R    | A    | S    | A    | T        | I    | L    | G    | A    | W    |
| H2 receptor              | -    | -    | -    | -    | P    | V    | R    | V    | A    | I    | S        | L    | V    | L    | I    | W    |
| H3 receptor              | -    | -    | -    | -    | T    | R    | R    | A    | V    | R    | <b>K</b> | M    | L    | L    | V    | W    |
| H4 receptor              | -    | -    | -    | -    | V    | L    | K    | I    | V    | T    | L        | M    | V    | A    | V    | W    |
| TA1 receptor             | -    | -    | -    | -    | I    | L    | V    | I    | C    | V    | M        | I    | F    | I    | S    | W    |
| A1 receptor              | -    | -    | -    | -    | P    | R    | R    | A    | A    | V    | A        | I    | A    | G    | C    | W    |
| A2A receptor             | -    | -    | -    | -    | G    | T    | R    | A    | K    | G    | I        | I    | A    | I    | C    | W    |
| A2B receptor             | -    | -    | -    | -    | G    | T    | R    | A    | R    | G    | V        | I    | A    | V    | L    | W    |
| A3 receptor              | -    | -    | -    | -    | H    | R    | R    | I    | W    | L    | A        | L    | G    | L    | C    | W    |
| P2Y1 receptor            | G    | R    | L    | K    | K    | K    | N    | A    | I    | C    | I        | S    | V    | L    | V    | W    |
| P2Y2 receptor            | R    | W    | G    | R    | A    | R    | Y    | A    | R    | R    | V        | A    | G    | A    | V    | W    |

|                |   |   |   |   |   |   |   |   |   |   |          |   |   |   |   |   |
|----------------|---|---|---|---|---|---|---|---|---|---|----------|---|---|---|---|---|
| P2Y4 receptor  | R | W | G | R | P | R | L | A | G | L | L        | C | L | A | V | W |
| P2Y6 receptor  | - | R | G | G | R | R | A | A | W | L | V        | C | V | A | V | W |
| P2Y11 receptor | S | H | L | R | P | K | H | A | W | A | V        | S | A | A | G | W |
| P2Y12 receptor | - | P | K | N | L | L | G | A | K | I | L        | S | V | V | I | W |
| P2Y13 receptor | - | L | K | K | P | V | F | A | K | T | V        | S | I | F | I | W |
| P2Y14 receptor | - | I | Q | S | V | S | Y | S | K | L | L        | S | V | I | V | W |
| CONSENSUS      | R | + | G | R | P | R | R | A | A | L | <b>M</b> | I | A | L | V | W |

**Table S3.** Parameters considered for the selection of a representative trajectory among three replicas: protein alpha carbon atoms ( $C\alpha$ ) average RMSD, ligand average RMSD, average Area per lipid headgroup ( $APL_{ave}$ ), and slope of the dynamic scoring function (DSF). RMSD and RMSF values are in  $\text{\AA}$ , APL is in  $\text{\AA}^2$ , and  $DSF_{tot}$  is adimensional.

|                               | <b>Run1</b> | <b>Run2</b> | <b>Run3</b>    |
|-------------------------------|-------------|-------------|----------------|
| $C\alpha$ RMSD                | 1.681       | 2.083       | 1.828          |
| <b>Ligand RMSD</b>            | 3.381       | 3.500       | 3.247          |
| <b>APL</b>                    | 66.717      | 66.584      | 67.084         |
| <b><math>DSF_{tot}</math></b> | -59.162     | -54.036     | <b>-70.179</b> |



**Video S1.** Video of the trajectory for the classical all-atom MD simulations (30 ns) of membrane-embedded **23**-h5HT<sub>2B</sub>R: Side view facing TM2, TM3 and TM4 (upper left panel); Side view facing TM5, TM6, and TM7 (upper right panel); Top view (lower left panel); IE profile (lower right panel). Receptor is represented in cyan ribbons with selected residues depicted in lines and water molecules in balls and sticks. H-bond interactions are represented as orange dashed lines. Lipids are represented as tan dotted surface.

[separate file, available as Supporting information)

**Figure S4.** Correlation plot of affinity of 2-Cl (N)-methanocarpa adenosine derivatives (compounds **13** – **35**) at the 5HT<sub>2B</sub>R and 5HT<sub>2C</sub>R.

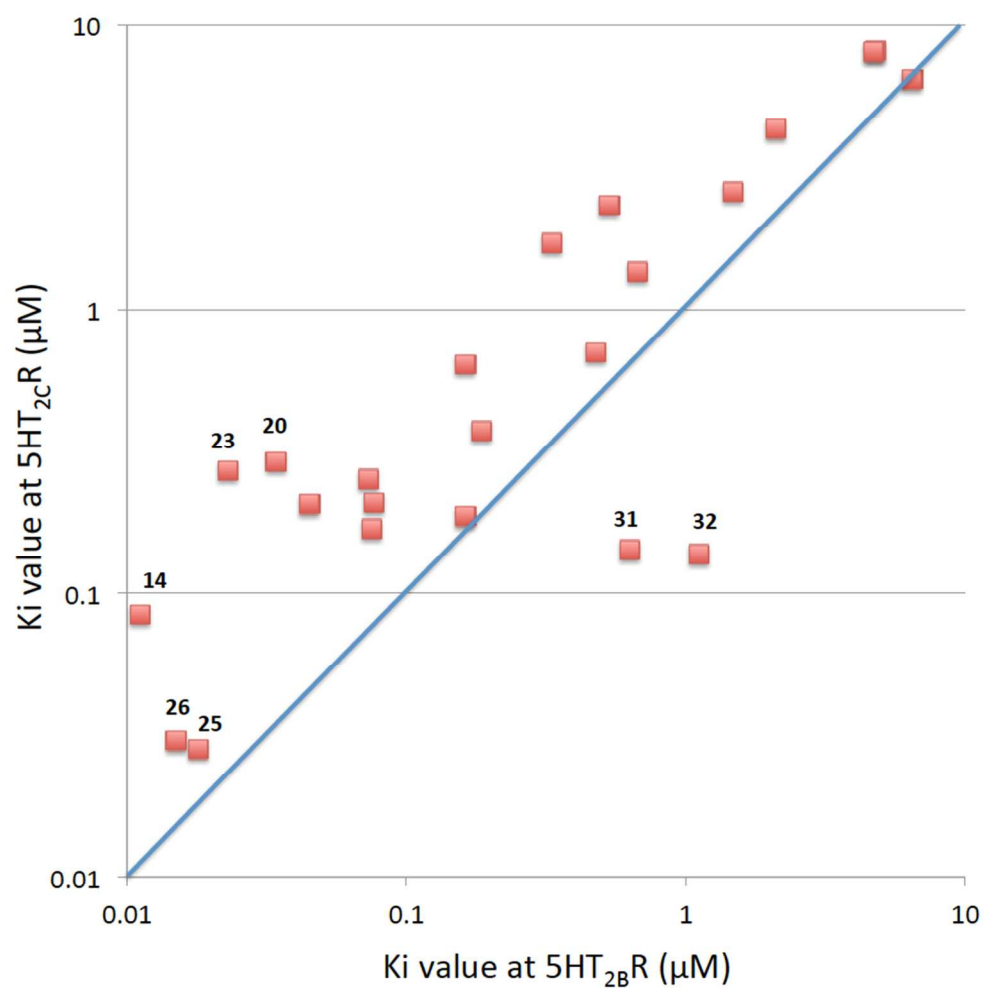

**Figure S5.** Other off-target activities.

Compound **3** (MRS5202) at the 5HT<sub>3</sub>R:

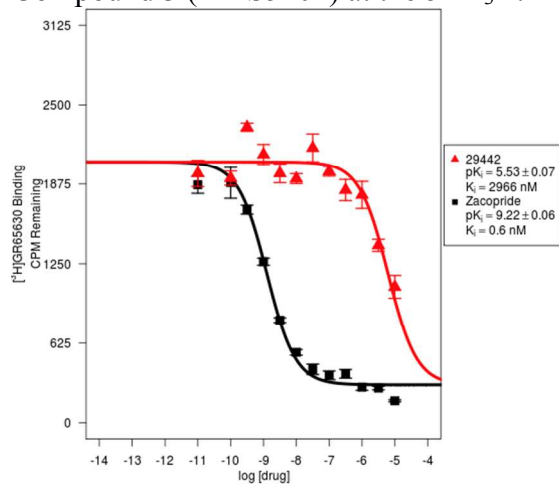

Compound **9** (CPCA) at the sigma1:

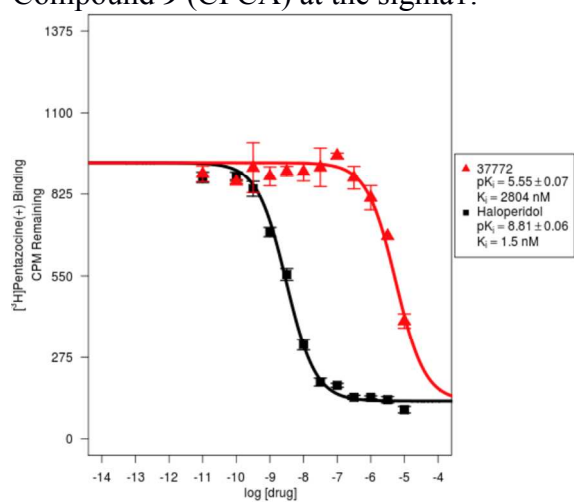

Compound **9** (CPCA) at the sigma2:

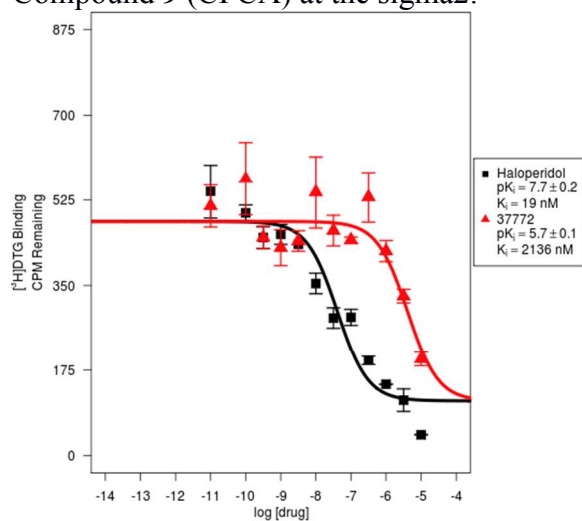

Compound **13** (MRS1947) at the sigma2:

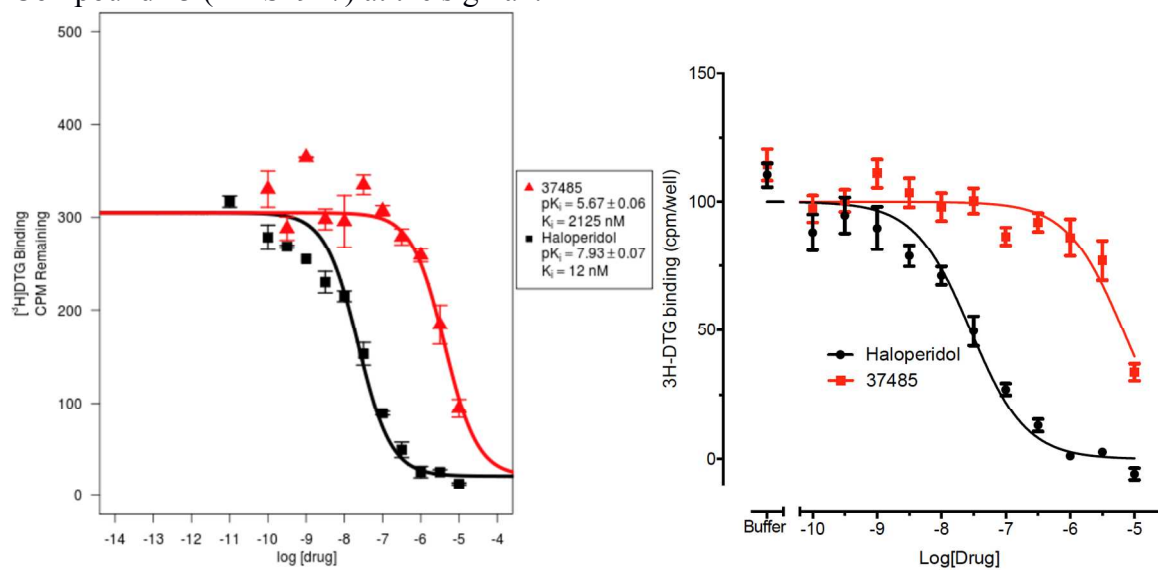

Compound **13** (MRS1947) at TSPO:

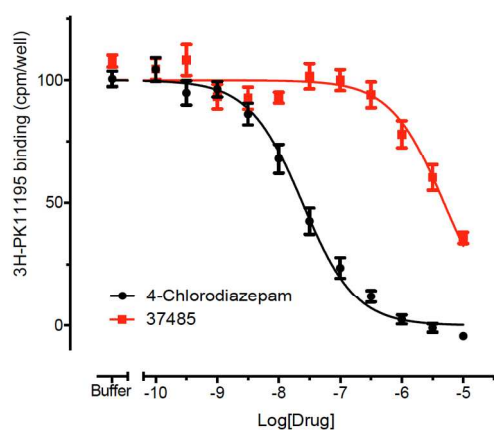

The curves for compounds **13** at sigma2 and TSPO were best fit using a monophasic isotherm with a variable Hill slope (F-test,  $P < 0.05$  was considered as statistically significant).

Compound **14** (MRS7134) at the dopamine transporter:

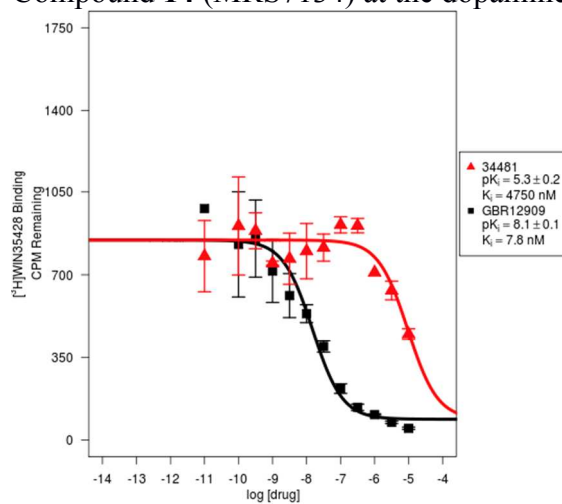

Compound **26** (MRS7221) at the TSPO: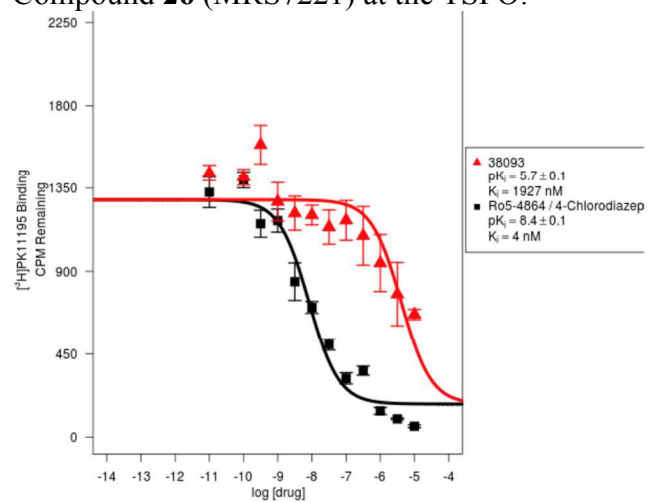Compound **27** (MRS7249) at the TSPO: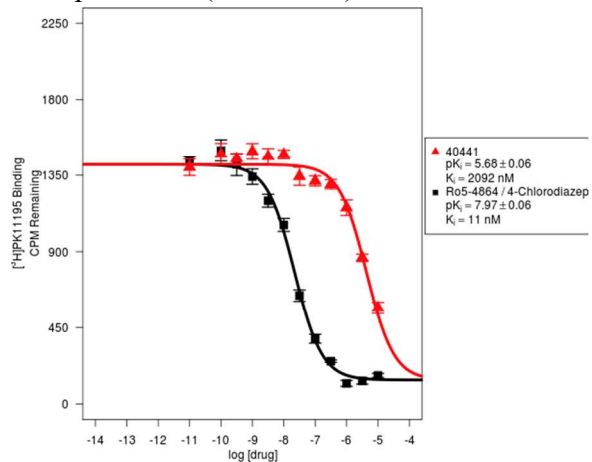Compound **30** (MRS7248) at the 5HT<sub>5A</sub>R: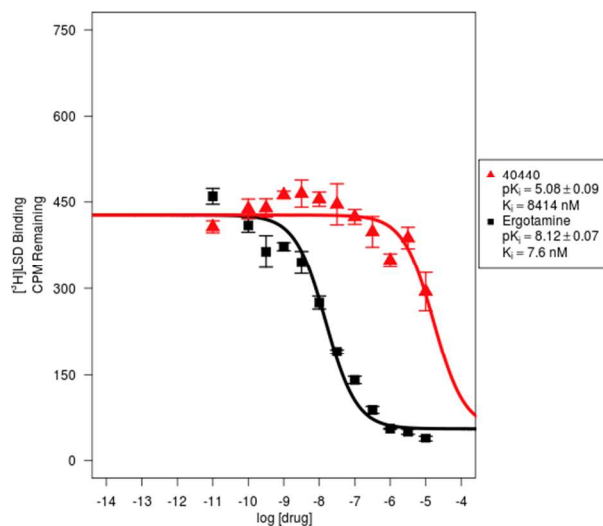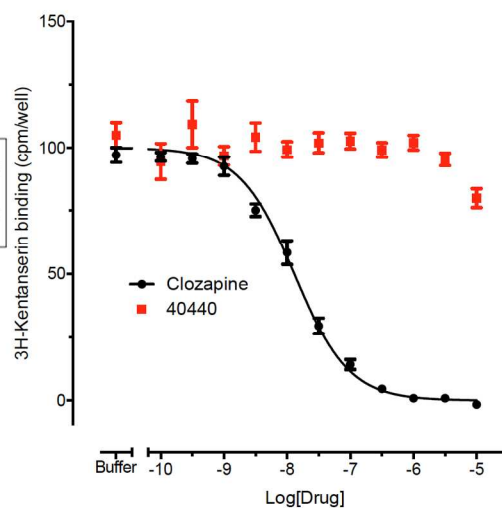

**Figure S6.** Functional assays of PDSP38093 (MRS7221, **26**)

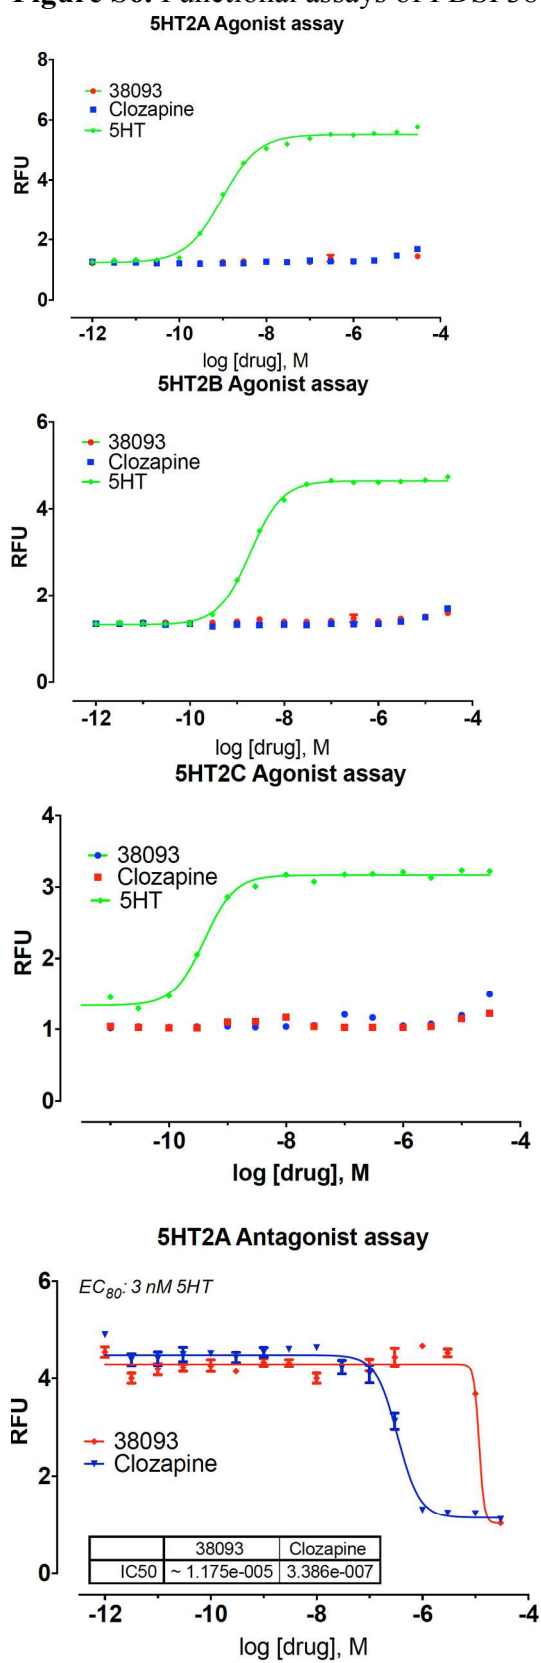

**Figure S7.** Summary of 5HT<sub>2</sub>R data, AR data and in vivo half-life for key nucleoside derivatives.

**Characterization of h5HT<sub>2</sub>R and hAR Radioligand Binding Inhibition and Functional Effects of (N)-Methanocarba Adenosine Derivatives**

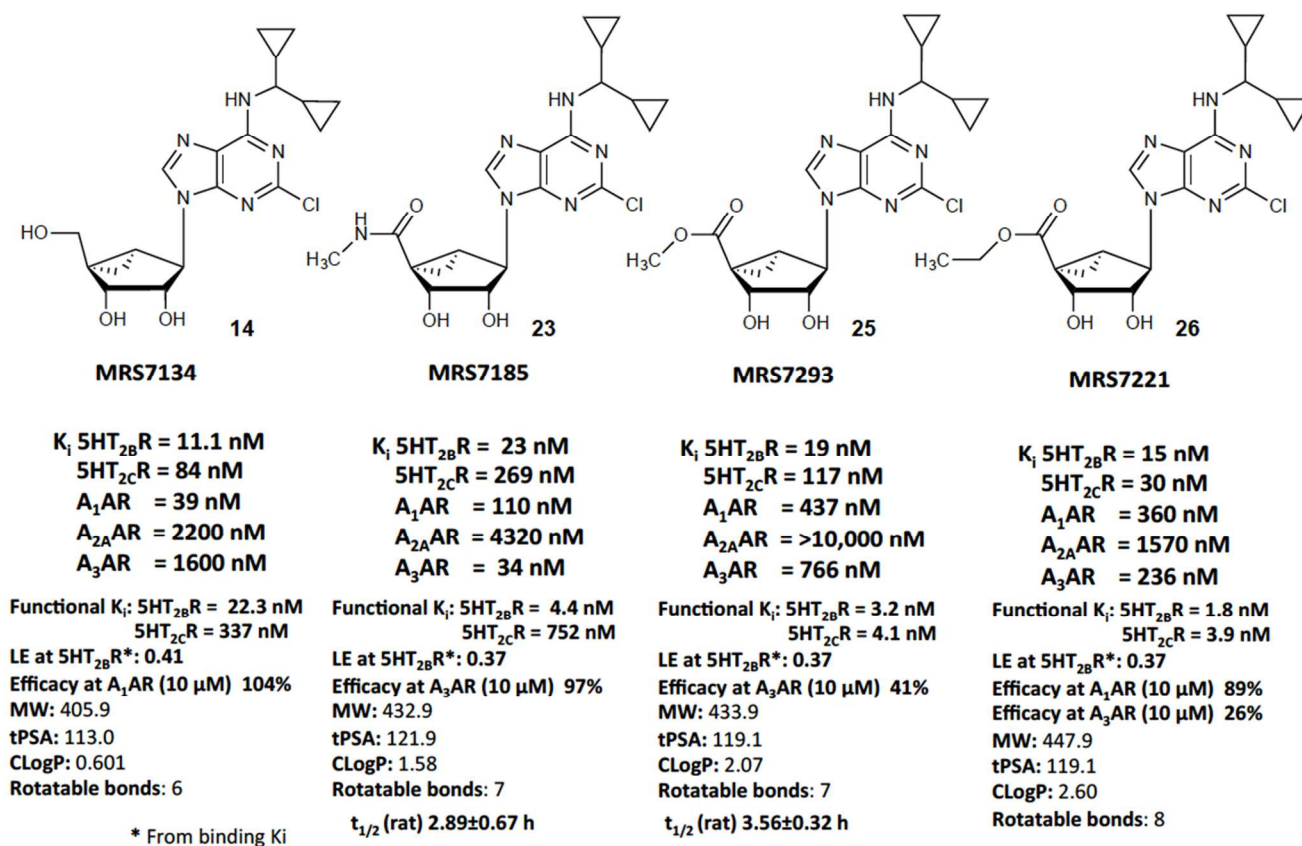

tPSA (total polar surface area) and CLogP calculated using ChemDraw Professional (PerkinElmer Informatics, Inc., Boston, MA), v. 15.0.

LE = 1.4(-logK<sub>i</sub>)/N, where N is the number of non-hydrogen atoms.

Figure S8. NMR and mass spectra of selected compounds.

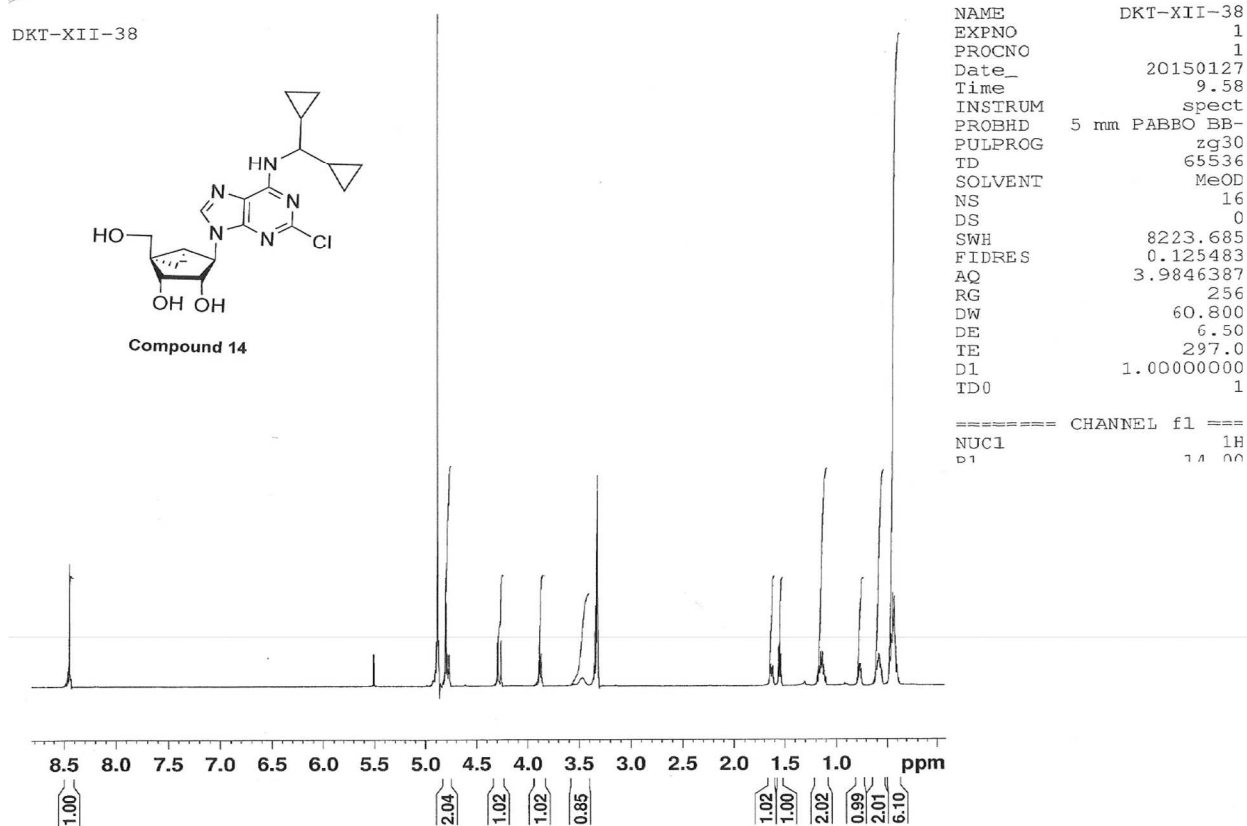

## Single Mass Analysis

Tolerance = 10.0 mDa / DBE: min = -50.0, max = 500.0

Element prediction: Off

Number of isotope peaks used for i-FIT = 3

## Monoisotopic Mass, Even Electron Ions

169 formula(e) evaluated with 3 results within limits (up to 10 closest results for each mass)

Elements Used:

C: 0-100 H: 0-200 N: 5-5 O: 0-30 35Cl: 1-1

26-Jan-2015

dkt-26jan15-xii-38 161 (2.976) Cn (Cen.5, 50.00, Ar); Sm (SG, 3x5.00); Sb (12.5.00)

TOF MS ES+  
1.47e+003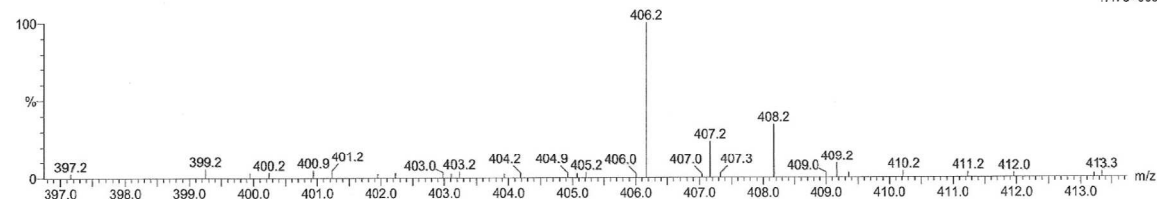

Minimum:

10.0 10.0 -50.0

Maximum:

500.0

| Mass     | Calc. Mass | mDa  | PPM   | DBE   | i-FIT | Formula              |
|----------|------------|------|-------|-------|-------|----------------------|
| 406.1653 | 406.1646   | 0.7  | 1.7   | 9.5   | 206.3 | C19 H25 N5 O3 35Cl ✓ |
|          | 406.1611   | 4.2  | 10.3  | -12.5 | 320.7 | C H33 N5 O16 35Cl    |
|          | 406.1705   | -5.2 | -12.8 | 0.5   | 227.4 | C12 H29 N5 O8 35Cl   |

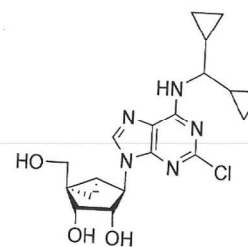

Compound 14



DKT-XIII-4

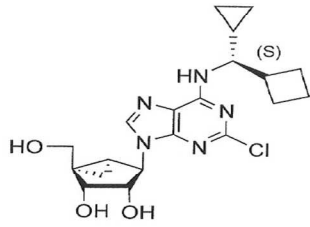

Compound 20

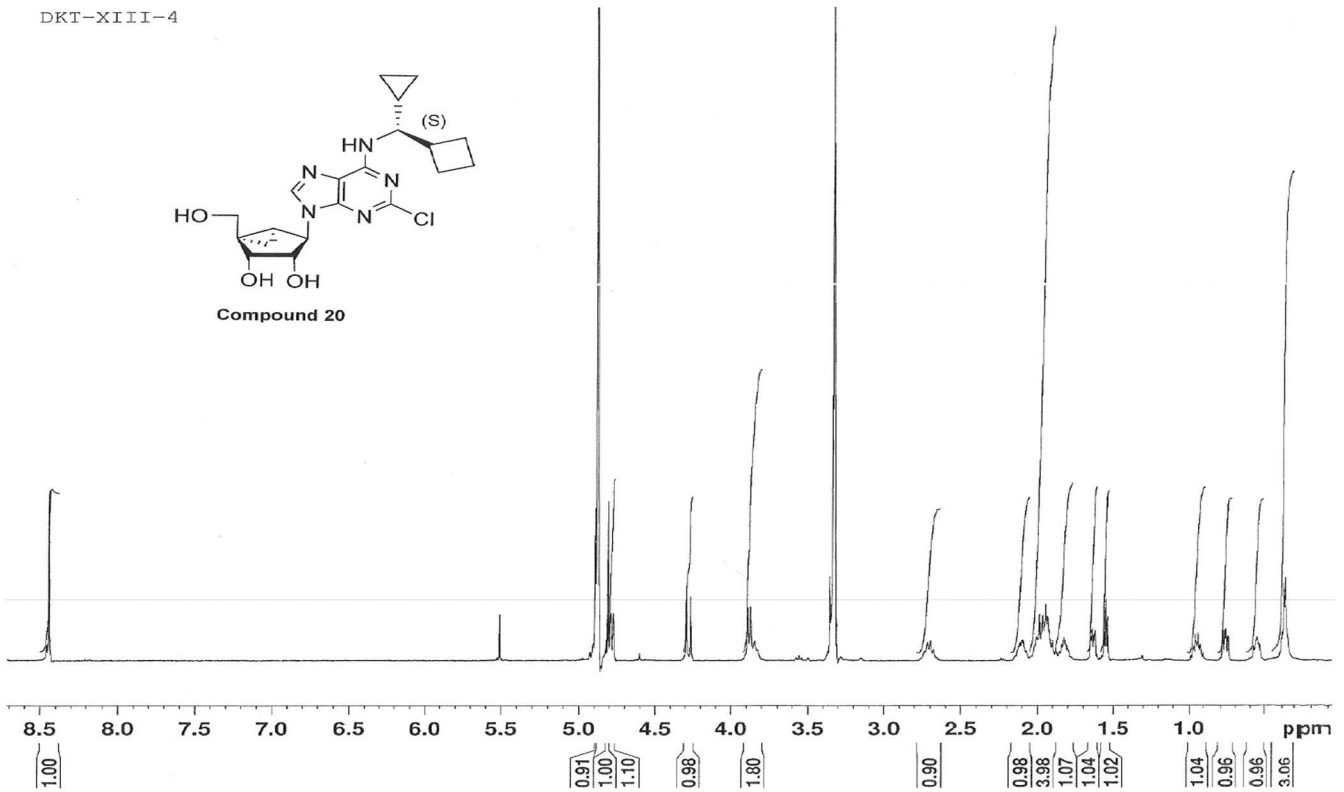

DKT-XIII-4\_419\_150520113539

5/20/2015 12:07:25 PM

DKT-XIII-4\_419\_150520113539 #84 RT: 1.21 AV: 1 NL: 1.09E6  
T: FTMS + p ESI Full ms [150.00-2000.00]

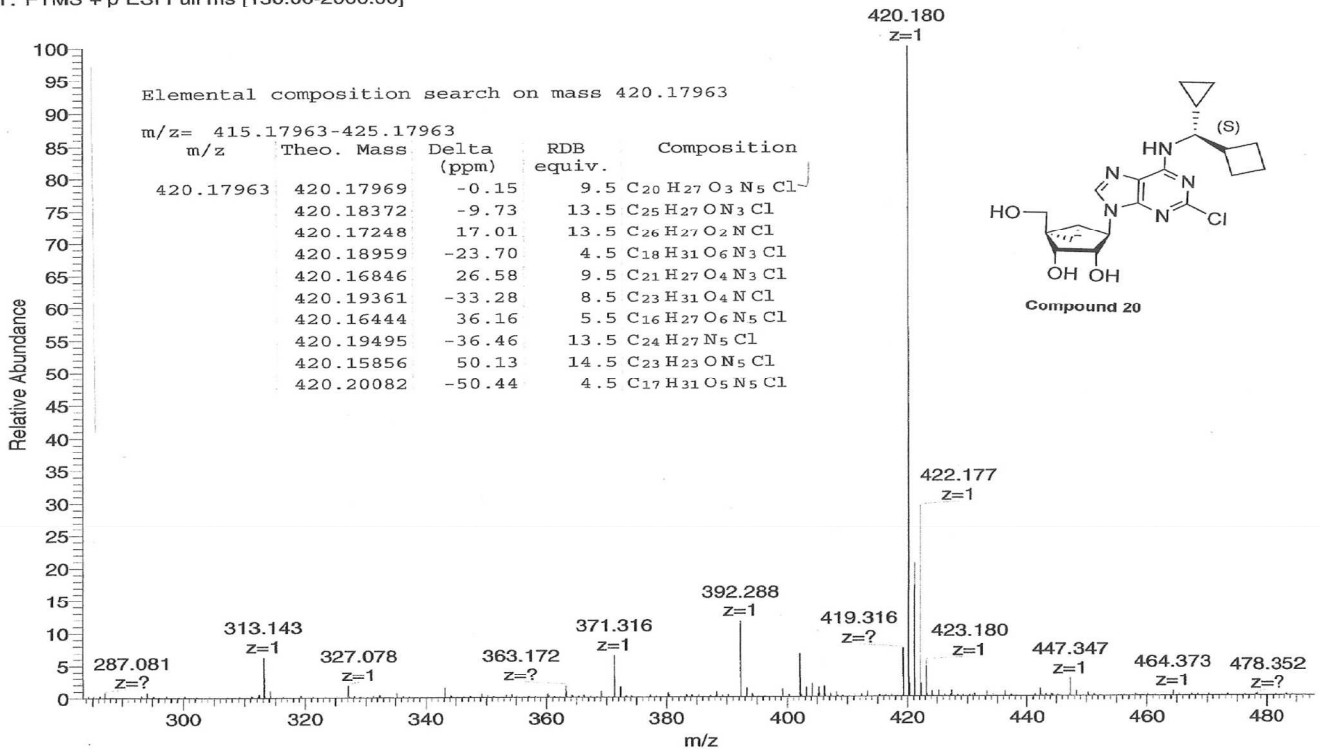

DKT-XIII-3

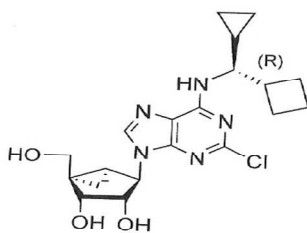

Compound 21

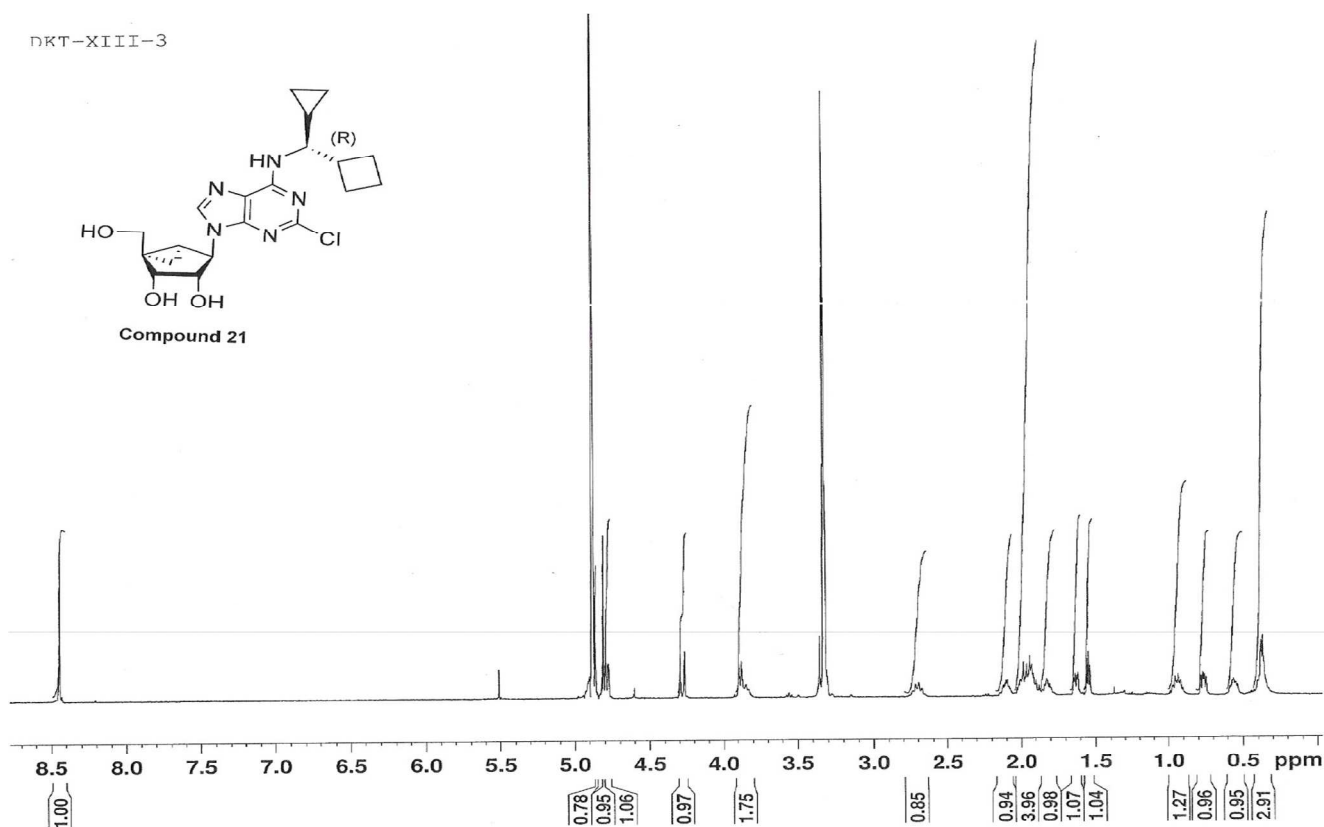

## Single Mass Analysis

Tolerance = 25.0 mDa / DBE: min = -2.0, max = 500.0

Element prediction: Off

Number of isotope peaks used for i-FIT = 3

## Monoisotopic Mass, Even Electron Ions

69 formula(e) evaluated with 6 results within limits (up to 19 closest results for each mass)

Elements Used:

C: 0-100 H: 0-200 N: 5-5 O: 0-30 35Cl: 1-1

19-May-2015

dkt-19may15-xiii-3 90 (1.664) Cn (Cen,7, 50.00, Ar); Sm (SG, 3x5.00); Sb (12.5.00)

TOF MS ES+  
7.43e+002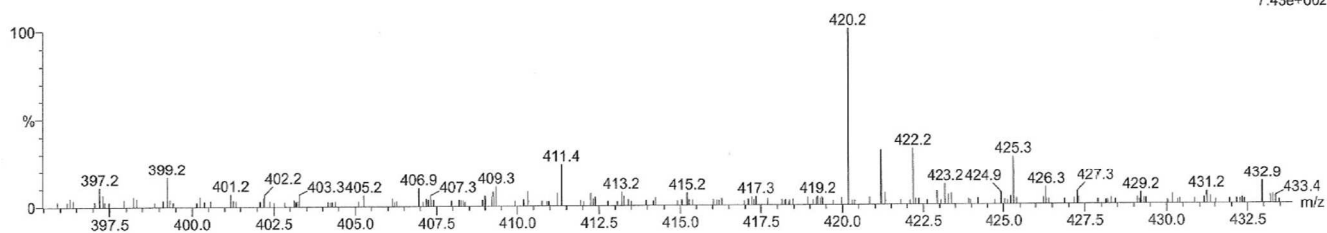

Minimum: -2.0  
Maximum: 25.0 10.0 500.0

| Mass     | Calc. Mass | mDa   | PPM   | DBE  | i-FIT | Formula            |
|----------|------------|-------|-------|------|-------|--------------------|
| 420.1799 | 420.1802   | -0.3  | -0.7  | 9.5  | 97.9  | C20 H27 N5 O3 35Cl |
|          | 420.1861   | -6.2  | -14.8 | 0.5  | 119.5 | C13 H31 N5 O8 35Cl |
|          | 420.1650   | 14.9  | 35.5  | 5.5  | 111.2 | C16 H27 N5 O6 35Cl |
|          | 420.1955   | -15.6 | -37.1 | 13.5 | 97.0  | C24 H27 N5 35Cl    |
|          | 420.1591   | 20.8  | 49.5  | 14.5 | 98.8  | C23 H23 N5 O 35Cl  |
|          | 420.2014   | -21.5 | -51.2 | 4.5  | 115.8 | C17 H31 N5 O5 35Cl |

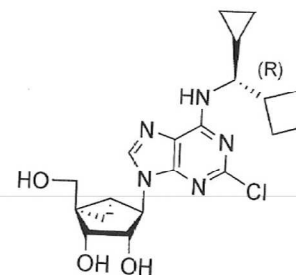

Compound 21

DKT-XIV-16

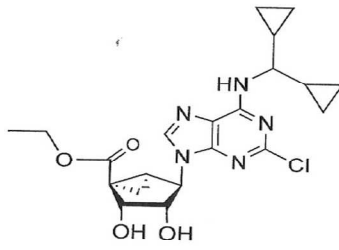

Compound 26

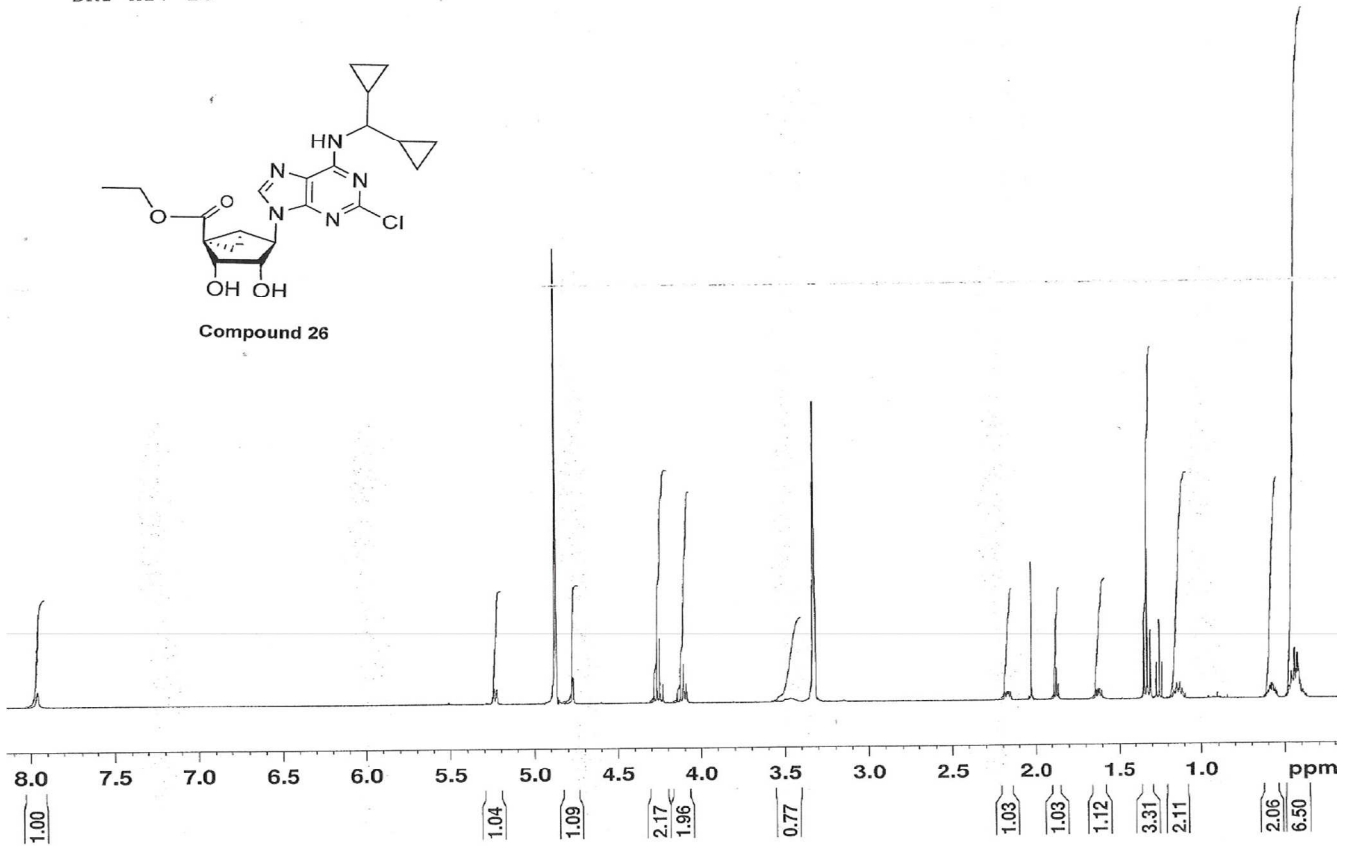

## Single Mass Analysis

Tolerance = 10.0 mDa / DBE: min = -2.0, max = 500.0

Element prediction: Off

Number of isotope peaks used for i-FIT = 3

## Monoisotopic Mass, Even Electron Ions

78 formula(e) evaluated with 2 results within limits (up to 19 closest results for each mass)

Elements Used:

C: 0-120 H: 0-200 N: 5-5 O: 0-40 35Cl: 1-1

13-Nov-2015

dkt-13nov15-xiv-16 118 (4.145) Cn (Cen,5, 50.00, Ar); Sm (SG, 3x5.00); Sb (12,5.00)

TOF MS ES+  
9.35e+003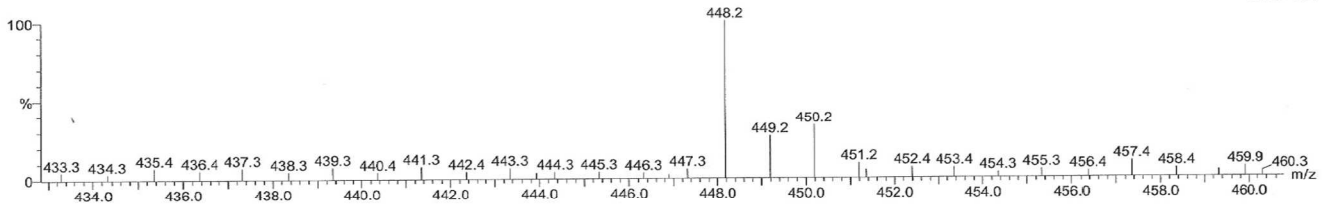

Minimum: -2.0  
Maximum: 500.0

| Mass     | Calc. Mass | mDa  | PPM   | DBE  | i-FIT  | Formula            |
|----------|------------|------|-------|------|--------|--------------------|
| 448.1745 | 448.1752   | -0.7 | -1.6  | 10.5 | 1201.5 | C21 H27 N5 O4 35Cl |
|          | 448.1810   | -6.5 | -14.5 | 1.5  | 1353.1 | C14 H31 N5 O9 35Cl |

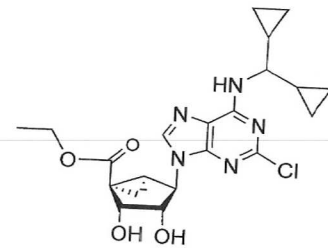

Compound 26

DKT-XIV-2

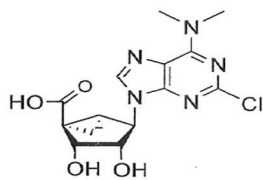

Compound 30

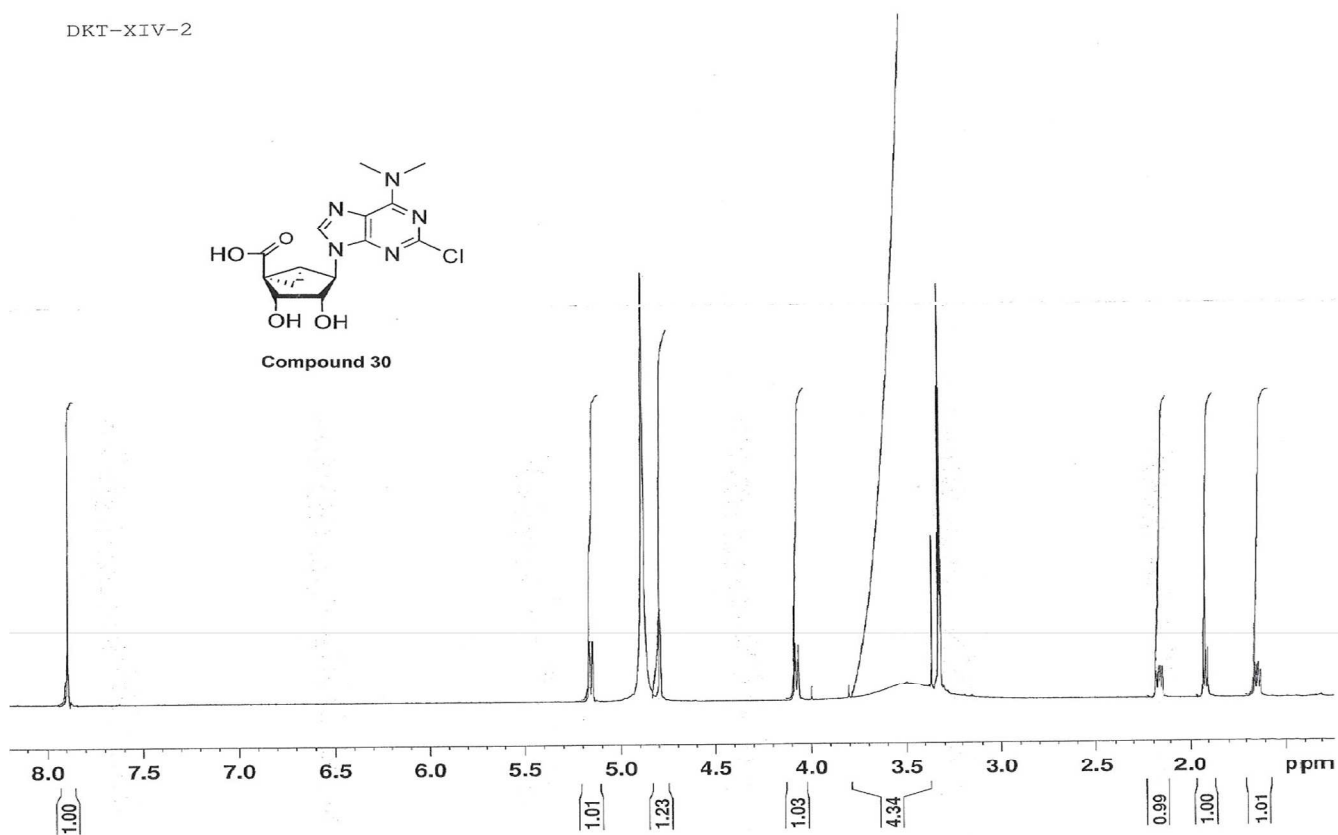

## Single Mass Analysis

Tolerance = 10.0 mDa / DBE: min = -2.0, max = 500.0

Element prediction: Off

Number of isotope peaks used for i-FIT = 3

## Monoisotopic Mass, Even Electron Ions

45 formula(e) evaluated with 2 results within limits (up to 19 closest results for each mass)

Elements Used:

C: 0-120 H: 0-200 N: 5-5 O: 0-50 35Cl: 1-1

20-Oct-2015

dkt-20oct16-xiv-2 64 (2.249) Cn (Cen,5, 50.00, Ar); Sm (SG, 3x5.00); Sb (12,5.00)

TOF MS ES+  
3.09e+003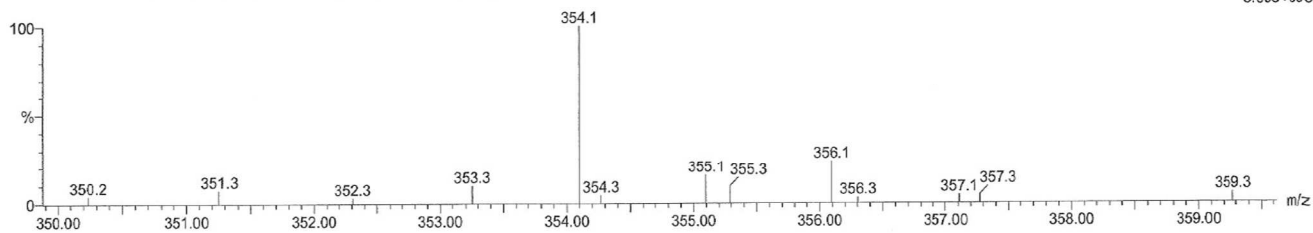

Minimum: -2.0  
Maximum: 10.0 10.0 500.0

| Mass     | Calc. Mass | mDa  | PPM   | DBE  | i-FIT | Formula            |
|----------|------------|------|-------|------|-------|--------------------|
| 354.0966 | 354.0969   | -0.3 | -0.8  | 8.5  | 299.8 | C14 H17 N5 O4 35Cl |
|          | 354.1028   | -6.2 | -17.5 | -0.5 | 321.3 | C7 H21 N5 O9 35Cl  |

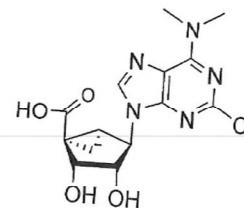

Compound 30

### Pharmacokinetic measurements of MRS7185 (23)

|                                                              |                                                                                    |             |             |                |                |             |
|--------------------------------------------------------------|------------------------------------------------------------------------------------|-------------|-------------|----------------|----------------|-------------|
| <b>Study Title:</b>                                          | PHARMACOKINETICS OF MRS7185 INTRAVENOUS ADMINISTRATION IN MALE SPRAGUE DAWLEY RATS |             |             |                |                |             |
| <b>Study Number</b>                                          | 1324-16-DMPK                                                                       |             |             |                |                |             |
| <b>Compound</b>                                              | MRS7185                                                                            |             |             |                |                |             |
| <b>Formulation IV solution</b>                               | DMSO: 20% HPBCD (10:90)                                                            |             |             |                |                |             |
| <b>Species</b>                                               | Male SD rat (Fed for IV group)                                                     |             |             |                |                |             |
| <b>Study Design</b>                                          | Single dosing for IV in non-anesthetized rats                                      |             |             |                |                |             |
| <b>Matrix</b>                                                | Plasma                                                                             |             |             |                |                |             |
| <b>Bioanalytical Details</b>                                 |                                                                                    |             |             |                |                |             |
| <b>Analyte</b>                                               | MRS7185                                                                            |             |             |                |                |             |
| <b>LLOQ</b>                                                  | 1.04 ng/mL                                                                         |             | <b>ULOQ</b> | 1040.00 ng/mL  |                |             |
| <b>Plasma Concentration (ng/mL) of MRS7185 (IV - 1mg/kg)</b> |                                                                                    |             |             |                |                |             |
| <b>Time (h)</b>                                              | <b>R1</b>                                                                          | <b>R2</b>   | <b>R3</b>   | <b>Mean</b>    | <b>Std Dev</b> | <b>% CV</b> |
| 0.08                                                         | 772.65                                                                             | 811.92      | 731.51      | <b>772.03</b>  | 40.21          | 5.21        |
| 0.25                                                         | 389.51                                                                             | 491.84      | 339.95      | <b>407.10</b>  | 77.46          | 19.03       |
| 0.50                                                         | 263.75                                                                             | 365.83      | 284.37      | <b>304.65</b>  | 53.98          | 17.72       |
| 1.00                                                         | 216.99                                                                             | 251.75      | 181.78      | <b>216.84</b>  | 34.99          | 16.13       |
| 2.00                                                         | 128.94                                                                             | 149.38      | 108.22      | <b>128.85</b>  | 20.58          | 15.97       |
| 4.00                                                         | 87.67                                                                              | 101.50      | 63.83       | <b>84.33</b>   | 19.06          | 22.60       |
| 8.00                                                         | 51.85                                                                              | 43.13       | 18.65       | <b>37.88</b>   | 17.21          | 45.44       |
| 12.00                                                        | 27.46                                                                              | 18.30       | 4.35        | <b>16.70</b>   | 11.64          | 69.67       |
| 24.00                                                        | 1.93                                                                               | BLQ         | BLQ         | <b>BLQ</b>     | NC             | NC          |
| Dose (mg/kg)                                                 | 1.00                                                                               | 1.00        | 1.00        | <b>1.00</b>    | 0.00           | 0.00        |
| Co(ng/mL)                                                    | 1085.99                                                                            | 1041.61     | 1070.60     | <b>1066.07</b> | 22.53          | 2.11        |
| t <sub>1/2</sub> (h)                                         | 3.31                                                                               | 3.24        | 2.11        | <b>2.89</b>    | 0.67           | 23.32       |
| V <sub>dss</sub> (L/kg)                                      | 3.63                                                                               | 2.86        | 3.00        | <b>3.16</b>    | 0.41           | 12.92       |
| V <sub>d</sub> (L/kg)                                        | 3.66                                                                               | 3.43        | 3.54        | <b>3.54</b>    | 0.12           | 3.26        |
| Cl (mL/min/kg)                                               | 12.78                                                                              | 12.25       | 19.35       | <b>14.80</b>   | 3.96           | 26.75       |
| AUC <sub>0-last</sub> (ng·h/mL)                              | 1295.05                                                                            | 1274.82     | 847.87      | <b>1139.24</b> | 252.54         | 22.17       |
| AUC <sub>0-inf</sub> (ng·h/mL)                               | 1304.27                                                                            | 1360.27     | 861.11      | <b>1175.22</b> | 273.46         | 23.27       |
| AUC <sub>Extra</sub> (%)                                     | 0.71                                                                               | 6.28        | 1.54        | <b>2.84</b>    | 3.01           | 105.82      |
| MRT <sub>0-last</sub> (h)                                    | 4.56                                                                               | 3.04        | 2.39        | <b>3.33</b>    | 1.12           | 33.53       |
| Rsq                                                          | 0.9965                                                                             | 0.9999998   | 0.9966      | <b>1.00</b>    | 0.00           | 0.20        |
|                                                              | 0.900034518                                                                        | 0.968292499 | 0.975566819 |                |                |             |

\*BLQ : Below level of Quantification, #n.c. : Not calculated

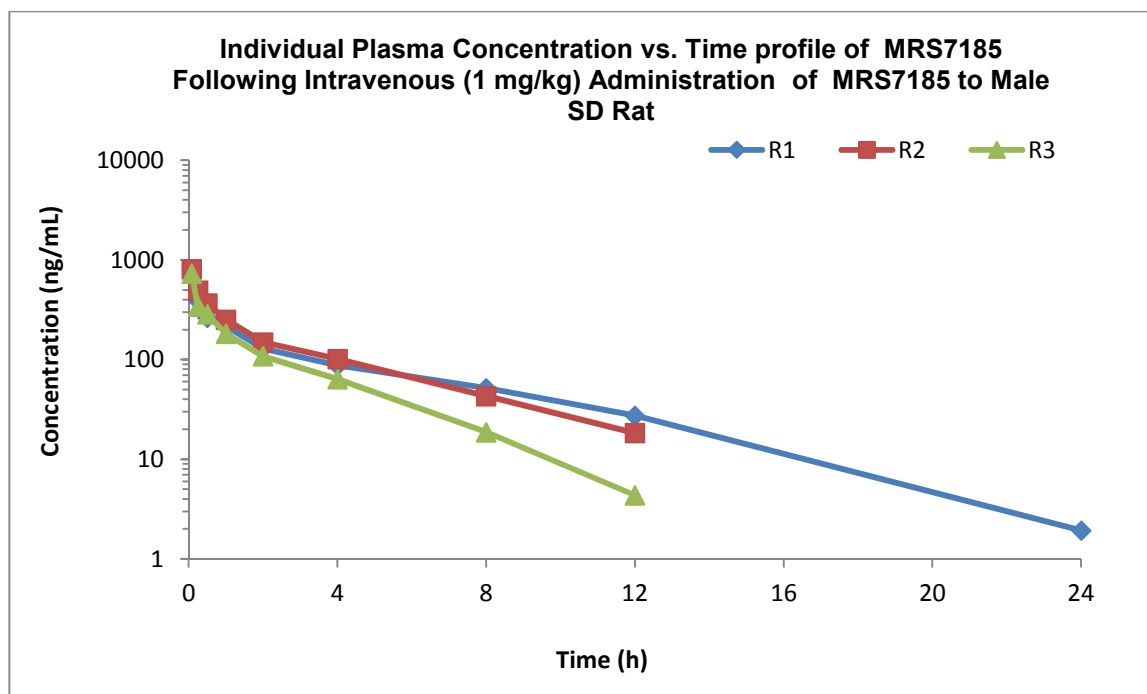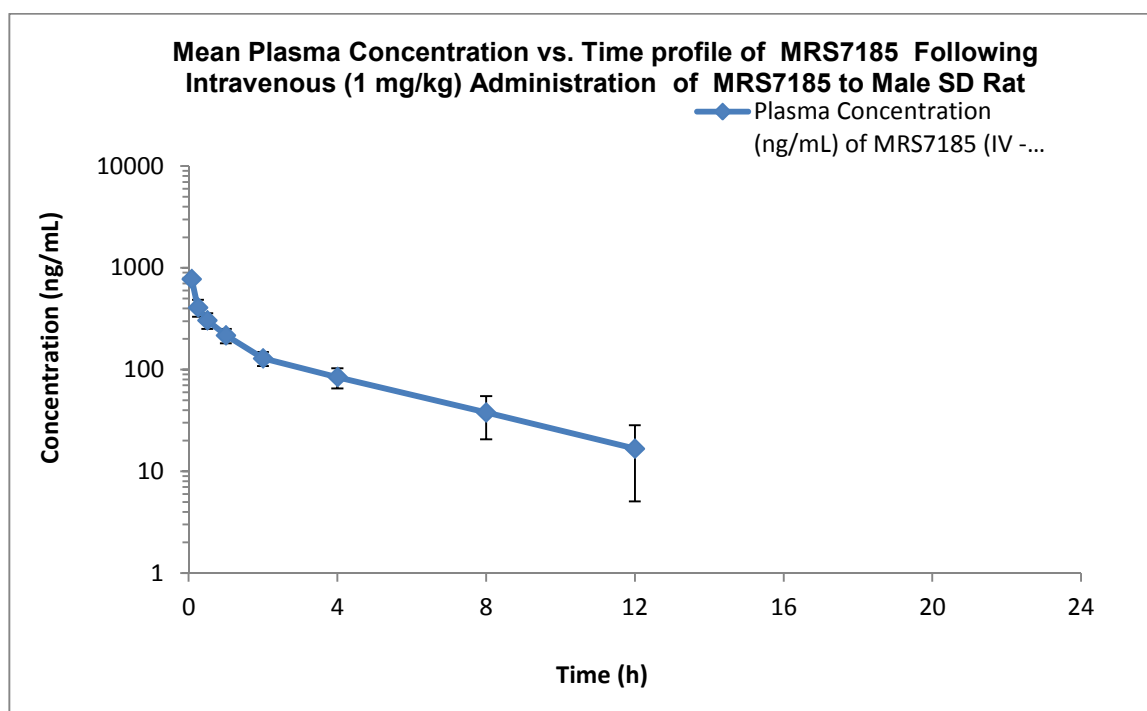

All measurements of ADME-tox parameters on MRS7185 (23) and MRS7293 (25) were performed by GVK BIO Sciences, Pvt Ltd., Hyderabad, India. Web: [www.gvkbio.com](http://www.gvkbio.com).

### Pharmacokinetic measurements of MRS7293 (25)

|                                                               |                                                                                    |             |             |                |                |             |
|---------------------------------------------------------------|------------------------------------------------------------------------------------|-------------|-------------|----------------|----------------|-------------|
| <b>Study Title:</b>                                           | PHARMACOKINETICS OF MRS7293 INTRAVENOUS ADMINISTRATION IN MALE SPRAGUE DAWLEY RATS |             |             |                |                |             |
| <b>Study Number</b>                                           | 1325-16-DMPK                                                                       |             |             |                |                |             |
| <b>Compound</b>                                               | MRS7293                                                                            |             |             |                |                |             |
| <b>Formulation IV solution</b>                                | DMSO: 20% HPBCD (10:90)                                                            |             |             |                |                |             |
| <b>Species</b>                                                | Male SD rat (Fed for IV group)                                                     |             |             |                |                |             |
| <b>Study Design</b>                                           | Single dosing for IV in non-anesthetized rats                                      |             |             |                |                |             |
| <b>Matrix</b>                                                 | Plasma                                                                             |             |             |                |                |             |
| <b>Bioanalytical Details</b>                                  |                                                                                    |             |             |                |                |             |
| <b>Analyte</b>                                                | MRS7293                                                                            |             |             |                |                |             |
| <b>LLOQ</b>                                                   | 2.08 ng/mL                                                                         |             | <b>ULOQ</b> | 1040.00 ng/mL  |                |             |
| <b>Plasma Concentration (ng/mL) of MRS7293 (IV – 1 mg/kg)</b> |                                                                                    |             |             |                |                |             |
| <b>Time (h)</b>                                               | <b>R1</b>                                                                          | <b>R2</b>   | <b>R3</b>   | <b>Mean</b>    | <b>Std Dev</b> | <b>% CV</b> |
| 0.08                                                          | 323.95                                                                             | 332.87      | 307.75      | <b>321.52</b>  | 12.73          | 3.96        |
| 0.25                                                          | 277.03                                                                             | 292.93      | 249.57      | <b>273.18</b>  | 21.94          | 8.03        |
| 0.50                                                          | 189.89                                                                             | 248.84      | 216.76      | <b>218.50</b>  | 29.51          | 13.51       |
| 1.00                                                          | 155.05                                                                             | 170.52      | 159.43      | <b>161.67</b>  | 7.97           | 4.93        |
| 2.00                                                          | 134.05                                                                             | 132.30      | 143.45      | <b>136.60</b>  | 6.00           | 4.39        |
| 4.00                                                          | 81.38                                                                              | 97.49       | 79.19       | <b>86.02</b>   | 9.99           | 11.62       |
| 8.00                                                          | 39.68                                                                              | 50.23       | 57.41       | <b>49.11</b>   | 8.92           | 18.16       |
| 12.00                                                         | 14.48                                                                              | 28.45       | 27.01       | <b>23.31</b>   | 7.68           | 32.96       |
| 24.00                                                         | BLQ                                                                                | 2.46        | 2.74        | <b>2.60</b>    | 0.20           | 7.61        |
| Dose (mg/kg)                                                  | 1.00                                                                               | 1.00        | 1.00        | <b>1.00</b>    | 0.00           | 0.00        |
| Co(ng/mL)                                                     | 350.15                                                                             | 354.70      | 341.53      | <b>348.79</b>  | 6.69           | 1.92        |
| t <sub>1/2</sub> (h)                                          | 3.21                                                                               | 3.83        | 3.64        | <b>3.56</b>    | 0.32           | 9.03        |
| V <sub>dss</sub> (L/kg)                                       | 4.56                                                                               | 4.49        | 4.83        | <b>4.62</b>    | 0.18           | 3.88        |
| V <sub>d</sub> (L/kg)                                         | 4.74                                                                               | 4.57        | 4.51        | <b>4.60</b>    | 0.12           | 2.59        |
| Cl (mL/min/kg)                                                | 17.07                                                                              | 13.78       | 14.29       | <b>15.05</b>   | 1.77           | 11.79       |
| AUC <sub>0-last</sub> (ng·h/mL)                               | 909.24                                                                             | 1196.24     | 1151.83     | <b>1085.77</b> | 154.48         | 14.23       |
| AUC <sub>0-inf</sub> (ng·h/mL)                                | 976.20                                                                             | 1209.84     | 1166.23     | <b>1117.42</b> | 124.23         | 11.12       |
| AUC <sub>Extra</sub> (%)                                      | 6.86                                                                               | 1.12        | 1.23        | <b>3.07</b>    | 3.28           | 106.74      |
| MRT <sub>0-last</sub> (h)                                     | 3.55                                                                               | 5.15        | 5.33        | <b>4.68</b>    | 0.98           | 20.96       |
| Rs <sub>q</sub>                                               | 0.9961                                                                             | 0.9957      | 1.0000      | <b>1.00</b>    | 0.00           | 0.24        |
|                                                               | 0.900034518                                                                        | 0.968292499 | 0.975566819 |                |                |             |

\*BLQ : Below level of Quantification, #n.c. : Not calculated

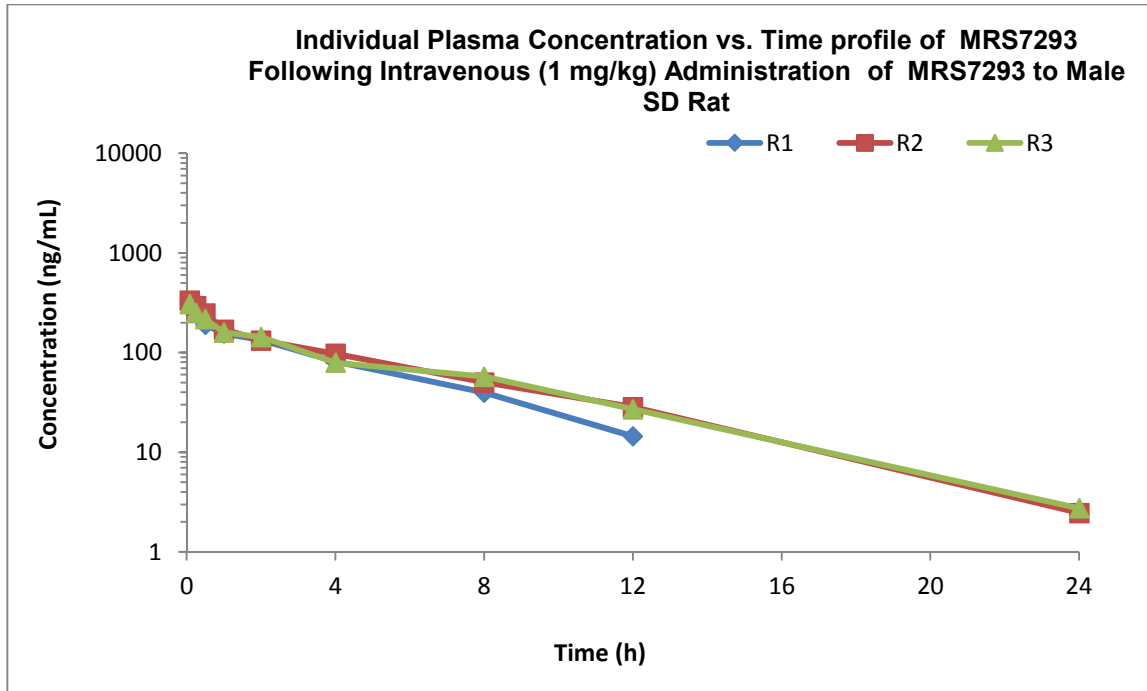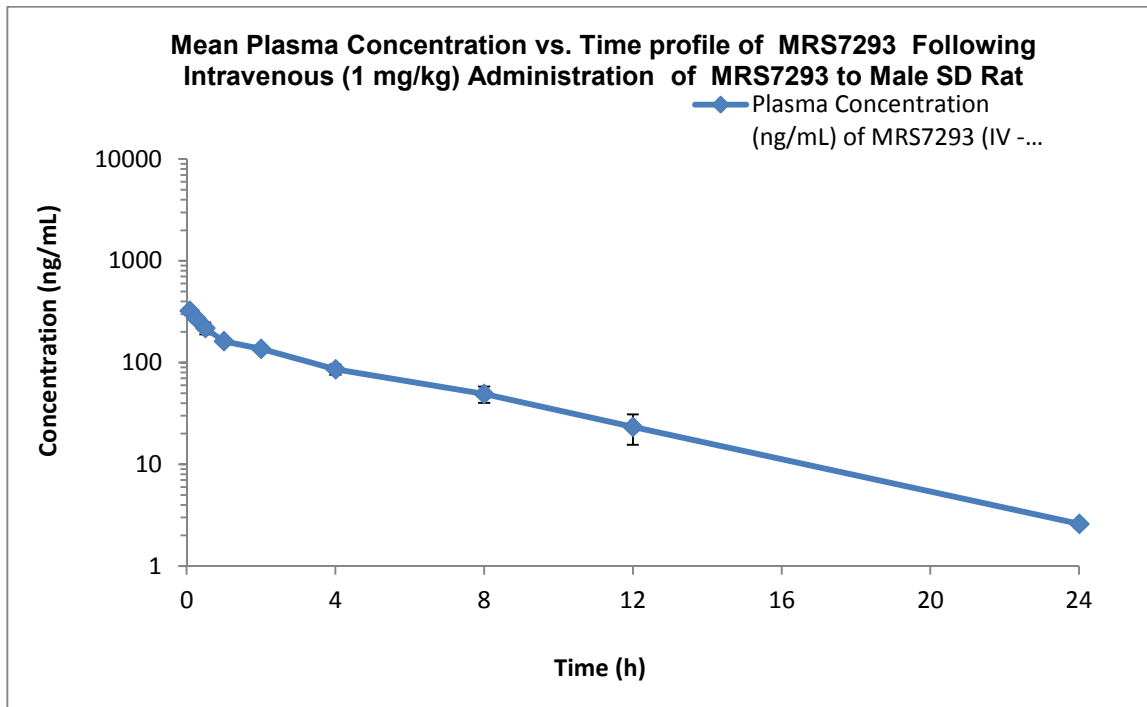



## Summary of PK parameters

| IV                              | MRS7185 | MRS7293 |
|---------------------------------|---------|---------|
| Dose (mg/kg)                    | 1.00    | 1.00    |
| Co(ng/mL)                       | 1066.07 | 348.79  |
| t <sub>1/2</sub> (h)            | 2.89    | 3.56    |
| Vd <sub>ss</sub> (L/kg)         | 3.16    | 4.62    |
| Vd (L/kg)                       | 3.54    | 4.60    |
| Cl (mL/min/kg)                  | 14.80   | 15.05   |
| AUC <sub>0-last</sub> (ng·h/mL) | 1139.24 | 1085.77 |
| AUC <sub>0-inf</sub> (ng·h/mL)  | 1175.22 | 1117.42 |
| AUC <sub>Extra</sub> (%)        | 2.84    | 3.07    |
| MRT <sub>0-last</sub> (h)       | 3.33    | 4.68    |
| Rs <sub>q</sub>                 | 1.00    | 1.00    |

## Dose response curves of cytotoxicity assay in HepG2 cells

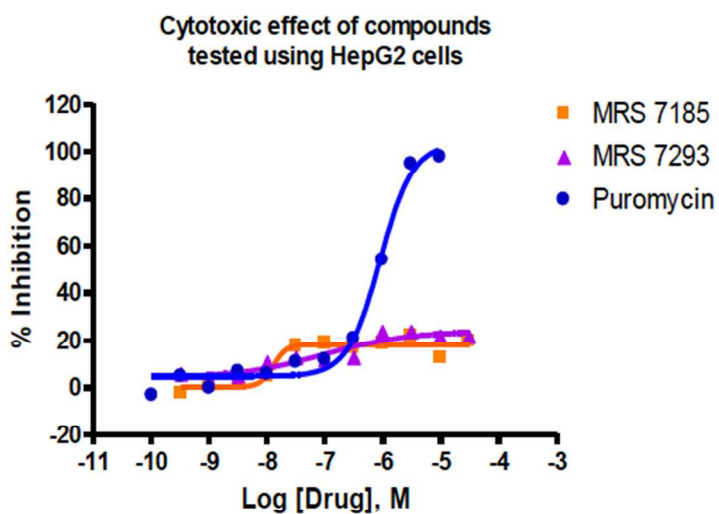

| Compound ID | CC50, $\mu$ M | pCC50 | CC50_Lower 95% Confidence interval | CC50_Upper 95% Confidence interval | Max Response | Max response concentration, $\mu$ M | HillSlope |
|-------------|---------------|-------|------------------------------------|------------------------------------|--------------|-------------------------------------|-----------|
| MRS 7185    | >30           | <4.52 | -                                  | -                                  | 20           | 30                                  | -         |
| MRS 7293    | >30           | <4.52 | -                                  | -                                  | 22           | 30                                  | -         |
| Puromycin   | 1.1           | 6     | 0.77                               | 1.6                                | 99           | 10                                  | 1.5       |

**STABILITY: Mouse liver microsomes**

| Compound Name | Half life (min) | % Rem @ 60 min | % Rem @ 60 min W/O Cofactor | CL int protein ( $\mu\text{L}/\text{min}/\text{mg}$ protein) | CL int invivo (mL/min/kg BW) | CL invivo (mL/min/kg BW)-Well stirred model | %QH (Well stirred model) | Classification |
|---------------|-----------------|----------------|-----------------------------|--------------------------------------------------------------|------------------------------|---------------------------------------------|--------------------------|----------------|
| MRS-7185      | 130.49          | 70.06          | 102.84                      | 5.42                                                         | 21.48                        | 17.29                                       | 19.21                    | Low            |
| MRS-7293      | 144.53          | 81.53          | 95.04                       | 2.76                                                         | 10.93                        | 9.72                                        | 10.80                    | Low            |
| Verapamil     | 2.24            | 0.00           | 102.08                      | 308.84                                                       | 1223.02                      | 83.83                                       | 93.14                    | High           |

**Rat liver microsomes**

| Compound Name | Half life (min) | % Rem @ 60 min | % Rem @ 60 min W/O Cofactor | CL int protein ( $\mu\text{L}/\text{min}/\text{mg}$ protein) | CL int invivo (mL/min/kg BW) | CL invivo (mL/min/kg BW)-Well stirred model | %QH (Well stirred model) | Classification |
|---------------|-----------------|----------------|-----------------------------|--------------------------------------------------------------|------------------------------|---------------------------------------------|--------------------------|----------------|
| MRS-7185      | 144.53          | 73.72          | 103.46                      | 4.75                                                         | 8.55                         | 7.61                                        | 10.88                    | Low            |
| MRS-7293      | 144.53          | 81.07          | 100.46                      | 3.66                                                         | 6.58                         | 6.01                                        | 8.59                     | Low            |
| Verapamil     | 2.93            | 0.00           | 95.21                       | 236.59                                                       | 425.86                       | 60.12                                       | 85.88                    | High           |

**Human liver microsomes**

| Compound Name | Half life (min) | % Rem @ 60 min | % Rem @ 60 min W/O Cofactor | CL int protein ( $\mu\text{L}/\text{min}/\text{mg}$ protein) | CL int invivo (mL/min/kg BW) | CL invivo (mL/min/kg BW)-Well stirred model | %QH (Well stirred model) | Classification |
|---------------|-----------------|----------------|-----------------------------|--------------------------------------------------------------|------------------------------|---------------------------------------------|--------------------------|----------------|
| MRS-7185      | 144.53          | 86.85          | 100.04                      | 1.75                                                         | 1.46                         | 1.36                                        | 6.48                     | Low            |
| MRS-7293      | 144.53          | 93.59          | 91.89                       | 0.77                                                         | 0.64                         | 0.61                                        | 2.93                     | Low            |
| Verapamil     | 3.09            | 0.11           | 96.46                       | 224.44                                                       | 186.74                       | 18.88                                       | 89.88                    | High           |

Classification criteria %QH

Low clearance <30

Medium clearance 30-70

High clearance >70

**Plasma stability (Mean% Remaining at 120 Min)**

| Compound ID | Mouse Plasma | Rat Plasma | Human Plasma |
|-------------|--------------|------------|--------------|
| MRS-7185    | 95.04        | 88.68      | 103.91       |
| MRS-7293    | 61.06        | 70.91      | 95.29        |
| Propranolol | 11.10        | 54.78      | 2.46         |

**Stability in simulated gastric fluid and intestinal fluid ( $t_{1/2}$ , Mean% Remaining at 120 min)**

| <b>FaSSGF (pH 1.60)</b> |                                  |                    |
|-------------------------|----------------------------------|--------------------|
| <b>Compound Name</b>    | <b><math>t_{1/2}</math>, min</b> | <b>% remaining</b> |
| MRS-7185                | 131.85                           | 53.18              |
| MRS-7293                | 125.07                           | 48.27              |
| Erythromycin            | 87.77                            | 38.66              |
|                         |                                  |                    |
|                         |                                  |                    |
| <b>FaSSIF (pH 6.50)</b> |                                  |                    |
| <b>Compound Name</b>    | <b>min</b>                       | <b>%</b>           |
| MRS-7185                | >480                             | 96.62              |
| MRS-7293                | >480                             | 96.79              |
| Erythromycin            | >480                             | 100.23             |

**CACO-2 cell permeability**

| <b>Compound Name</b> | <b>Average Values</b>                         |                                               |                     |                         |                         | <b>Classification</b> |
|----------------------|-----------------------------------------------|-----------------------------------------------|---------------------|-------------------------|-------------------------|-----------------------|
|                      | <b>Papp (<math>10^{-6}</math> cm/sec)</b>     |                                               | <b>Efflux Ratio</b> | <b>% Recovery (A2B)</b> | <b>% Recovery (B2A)</b> |                       |
|                      | <b>A2B Papp (<math>10^{-6}</math> cm/sec)</b> | <b>B2A Papp (<math>10^{-6}</math> cm/sec)</b> |                     |                         |                         |                       |
| MRS-7185             | 4.73                                          | 46.21                                         | 11.70               | 86.00                   | 98.14                   | Medium                |
| MRS-7293             | 18.47                                         | 30.59                                         | 1.67                | 88.00                   | 101.54                  | High                  |
| Propranolol          | 32.20                                         | 27.79                                         | 0.87                | 79.50                   | 97.06                   | High                  |
| Atenolol             | 0.00                                          | 1.37                                          | #DIV/0!             | 90.00                   | 97.39                   | Low                   |

Result of permeability Papp ( $10^{-6}$  cm/s)      Range

<1.5

Low permeable

1.5 to 10

Medium permeable

>10

High permeable

Conclusions

MRS-7185 is moderately permeable with significant efflux in Caco-2 cell system.

MRS-7293 is high permeable compound with slight efflux in Caco-2 cell system.

**Inhibition of cytochrome P450 isozymes**

| <b>Compound</b> | <b>IC50 (<math>\mu</math>M)</b> |        |            |       |             |       |            |       |            |       |
|-----------------|---------------------------------|--------|------------|-------|-------------|-------|------------|-------|------------|-------|
|                 | <b>1A2</b>                      |        | <b>2C9</b> |       | <b>2C19</b> |       | <b>2D6</b> |       | <b>3A4</b> |       |
| MRS-7185        | >                               | 30.00  | >          | 30.00 | >           | 30.00 | >          | 30.00 | >          | 30.00 |
| MRS-7293        | >                               | 30.00  | =          | 20.11 | >           | 30.00 | >          | 30.00 | >          | 30.00 |
| QC              | =                               | 0.0078 | =          | 0.45  | =           | 0.50  | =          | 0.02  | =          | 0.03  |

**Bioanalytical method for pharmacokinetic study of 23 and 25 (quality control shown for 23):**

|                                                                                                                                                                                                                                                                                                                                                                                                                                    |             |                                            |                                   |                              |                                           |
|------------------------------------------------------------------------------------------------------------------------------------------------------------------------------------------------------------------------------------------------------------------------------------------------------------------------------------------------------------------------------------------------------------------------------------|-------------|--------------------------------------------|-----------------------------------|------------------------------|-------------------------------------------|
| <b>Study Number</b>                                                                                                                                                                                                                                                                                                                                                                                                                |             | 1324-16-DMPK                               |                                   |                              |                                           |
| <b>Study Type</b>                                                                                                                                                                                                                                                                                                                                                                                                                  |             | IVPK study                                 |                                   |                              |                                           |
| <b>Instrument ID</b>                                                                                                                                                                                                                                                                                                                                                                                                               |             | API 4000                                   |                                   |                              |                                           |
| <b>COMPOUND DETAILS:</b>                                                                                                                                                                                                                                                                                                                                                                                                           |             |                                            |                                   |                              |                                           |
| <b>Name of Compound</b>                                                                                                                                                                                                                                                                                                                                                                                                            |             | <b>Molecular weight Free Form</b>          | <b>Molecular weight Salt Form</b> | <b>Purity/potency/ assay</b> | <b>Diluents- Master stock preparation</b> |
| <b>Analyte</b>                                                                                                                                                                                                                                                                                                                                                                                                                     | MRS7185     | 432.90                                     | 432.90                            | 100.00%                      | DMSO                                      |
| <b>Internal Standard</b>                                                                                                                                                                                                                                                                                                                                                                                                           | Telmesartan | 514.50                                     | 514.50                            | 98.00%                       | DMSO                                      |
| <b>CHROMATOGRAPHY:</b>                                                                                                                                                                                                                                                                                                                                                                                                             |             |                                            |                                   |                              |                                           |
| <b>Generic Gradient:</b>                                                                                                                                                                                                                                                                                                                                                                                                           |             |                                            |                                   |                              |                                           |
| <b>Time (min)</b>                                                                                                                                                                                                                                                                                                                                                                                                                  |             | <b>%A</b>                                  | <b>%B</b>                         |                              |                                           |
| 0.01                                                                                                                                                                                                                                                                                                                                                                                                                               |             | 90                                         | 10                                |                              |                                           |
| 1.00                                                                                                                                                                                                                                                                                                                                                                                                                               |             | 5                                          | 95                                |                              |                                           |
| 2.60                                                                                                                                                                                                                                                                                                                                                                                                                               |             | 5                                          | 95                                |                              |                                           |
| 2.70                                                                                                                                                                                                                                                                                                                                                                                                                               |             | 90                                         | 10                                |                              |                                           |
| 3.50                                                                                                                                                                                                                                                                                                                                                                                                                               |             | 90                                         | 10                                |                              |                                           |
| <b>Mobile Phase (A)</b>                                                                                                                                                                                                                                                                                                                                                                                                            |             | 0.01% Formic acid in water                 |                                   |                              |                                           |
| <b>Mobile Phase (B)</b>                                                                                                                                                                                                                                                                                                                                                                                                            |             | 100 %Acetonitrile                          |                                   |                              |                                           |
| <b>Column</b>                                                                                                                                                                                                                                                                                                                                                                                                                      |             | Kinetics EVO C18, 50*4.6 mm, 5 $\mu$       |                                   |                              |                                           |
| <b>Injection Volume (<math>\mu</math>L)</b>                                                                                                                                                                                                                                                                                                                                                                                        |             | 10                                         |                                   |                              |                                           |
| <b>Flow Rate (mL/min)</b>                                                                                                                                                                                                                                                                                                                                                                                                          |             | 1                                          |                                   |                              |                                           |
| <b>Run Time(min)</b>                                                                                                                                                                                                                                                                                                                                                                                                               |             | 3.5                                        |                                   |                              |                                           |
| <b>Sample Cooler Temperature (<math>^{\circ}</math>C)</b>                                                                                                                                                                                                                                                                                                                                                                          |             | 10                                         |                                   |                              |                                           |
| <b>Column Oven Temperature (<math>^{\circ}</math>C)</b>                                                                                                                                                                                                                                                                                                                                                                            |             | 40                                         |                                   |                              |                                           |
| <b>Rinsing Solution</b>                                                                                                                                                                                                                                                                                                                                                                                                            |             | Acetonitrile:Methanol: water::20:60:20,V/V |                                   |                              |                                           |
| <b>SAMPLE PREPARATION:</b>                                                                                                                                                                                                                                                                                                                                                                                                         |             |                                            |                                   |                              |                                           |
| <b>Extraction Technique</b>                                                                                                                                                                                                                                                                                                                                                                                                        |             | <b>Protein Precipitation</b>               |                                   |                              |                                           |
| <b>Extraction Solvent</b>                                                                                                                                                                                                                                                                                                                                                                                                          |             | <b>Acetonitrile Containing IS</b>          |                                   |                              |                                           |
| <b>Calibration Curve &amp; QC preparation:</b> 2.0 $\mu$ L of calibration curve standards added to 48 $\mu$ L of blank matrix and precipitated with 200 $\mu$ L of acetonitrile containing internal standard at 200ng/mL conc. then vortexed for 5 min at 850 rpm, centrifuged at 4000 rpm for 5 min at 4 $^{\circ}$ C, from this 110 $\mu$ L of supernatant was separated and diluted with 130 $\mu$ L of methanol:water(1:1,v/v) |             |                                            |                                   |                              |                                           |
| <b>Sample Preparation:</b> 50 $\mu$ L of sample was taken and precipitated with 200 $\mu$ L of Acetonitrile containing internal standard at 200 ng/mL conc. then vortexed for 5 min at 850 rpm, centrifuged at 4000 rpm for 5 min at 4 $^{\circ}$ C, from this 110 $\mu$ L of supernatant was separated and diluted with 130 $\mu$ L of methnol:water(1:1,v/v) .                                                                   |             |                                            |                                   |                              |                                           |

| MASS SPECTROMETRIC CONDITION:       |             |                      |                 |         |                             |                         |                       |
|-------------------------------------|-------------|----------------------|-----------------|---------|-----------------------------|-------------------------|-----------------------|
| Ionization Mode-Polarity            |             | ESI-Positive         |                 |         |                             |                         |                       |
| Name of Compound                    |             | Retention Time (Min) | MRM Transitions |         | Declustering Potential (DP) | Entrance Potential (EP) | Collision Energy (CE) |
|                                     |             |                      | Q1-mass         | Q3-mass |                             |                         |                       |
| Analyte                             | MRS7185     | 1.47                 | 433.10          | 264.10  | 112                         | 10                      | 30                    |
| Analyte                             | MRS7293     | 1.57                 | 434.20          | 66.90   | 120                         | 10                      | 49                    |
| Internal Standard                   | Telmesartan | 1.37                 | 515.30          | 276.10  | 60                          | 10                      | 64                    |
| Collision Cell Exit Potential (CXP) |             | 12                   |                 |         |                             |                         |                       |
| Collision Gas (CAD)                 |             | 12                   |                 |         |                             |                         |                       |
| Curtain Gas (CUR)                   |             | 25                   |                 |         |                             |                         |                       |
| Nebulizer Gas (GS1)                 |             | 50                   |                 |         |                             |                         |                       |
| Heater Gas (GS2)                    |             | 55                   |                 |         |                             |                         |                       |
| Nebulizer current (NC)              |             | 5                    |                 |         |                             |                         |                       |
| Temperature (TEM)                   |             | 600 <sup>0</sup> C   |                 |         |                             |                         |                       |
| Interface Heater (ihe)              |             | Off                  |                 |         |                             |                         |                       |

#### Calibration Curve Standards of MRS7185 in SD rat plasma

| Standard        | Concentration [ng/mL] |            | % Accuracy |
|-----------------|-----------------------|------------|------------|
|                 | Nominal               | Calculated |            |
| STD 1 (LLOQ)    | 1.04                  | 1.08       | 103.38     |
| STD 2           | 2.08                  | 1.89       | 90.97      |
| STD 3           | 10.41                 | 11.53      | 110.80     |
| STD 4           | 52.07                 | 54.10      | 103.89     |
| STD 5           | 208.26                | 199.34     | 95.72      |
| STD 6           | 520.65                | 525.03     | 100.84     |
| STD 7           | 833.04                | 785.68     | 94.32      |
| STD 8           | 936.00                | 918.94     | 98.18      |
| STD 9 (ULOQ)    | 1040.00               | 1059.79    | 101.90     |
| Correlation (r) | 0.998                 |            |            |
| Regression equ. | Y=0.000591X+0.000129  |            |            |

| Regression Fit                                      |       | Linear with 1/x <sup>2</sup> weighting factor |            |            |
|-----------------------------------------------------|-------|-----------------------------------------------|------------|------------|
| <b>Quality Controls of MRS7185 in SD rat plasma</b> |       |                                               |            |            |
| QC Set                                              |       | Concentration (ng/mL)                         |            | % Accuracy |
|                                                     |       | Nominal                                       | Calculated |            |
| HQC                                                 | HQC-1 | 920                                           | 829.28     | 90.14      |
|                                                     | HQC-2 |                                               | 929.89     | 101.07     |
| MQC                                                 | MQC-1 | 552                                           | 545.61     | 98.84      |
|                                                     | MQC-2 |                                               | 555.58     | 100.65     |
| LQC                                                 | LQC-1 | 4.42                                          | 5.3        | 119.88     |
|                                                     | LQC-2 |                                               | 5.5        | 124.45*    |
